# Supplementary material for: A Cytotoxic Heterodimeric Cyclic Diarylheptanoid with a Rearranged Benzene Ring from the Seagrass Zostera marina
Source: PubMed Central journal article supplement (PMC9623580; doi:10.1021/acs.jnatprod.2c00796), 2022-10-20
Supplement: np2c00796_si_001.pdf [file np2c00796_si_001.pdf]

# Supporting Information for

## A Cytotoxic Heterodimeric Cyclic Diarylheptanoid with a Rearranged Benzene Ring from the Seagrass *Zostera marina*

Laura Grauso,<sup>§,‡</sup> Yan Li,<sup>†,‡</sup> Silvia Scarpato,<sup>‡</sup> Nunzio Antonio Cacciola,<sup>#</sup> Paola De Cicco,<sup>‡,#</sup> Christian Zidorn,<sup>†</sup> and Alfonso Mangoni<sup>\*,‡</sup>

<sup>§</sup> Dipartimento di Agraria, Università degli Studi di Napoli Federico II, Via Università 100, 80055 Portici (NA), Italy

<sup>†</sup> Pharmazeutisches Institut, Abteilung Pharmazeutische Biologie, Christian-Albrechts-Universität zu Kiel, Gutenbergstraße 76, 24118, Kiel, Germany

<sup>‡</sup> Dipartimento di Farmacia, Università degli Studi di Napoli Federico II, Via D. Montesano 49, 80131 Napoli, Italy

<sup>#</sup> Dipartimento di Medicina Veterinaria e Produzioni Animali, Università degli Studi di Napoli Federico II, Via F. Delpino, 80137 Napoli, Italy

### Table of Contents

|                                                                |                                                                                                                                                             |    |
|----------------------------------------------------------------|-------------------------------------------------------------------------------------------------------------------------------------------------------------|----|
| <b>Chart S1</b>                                                | Diarylheptanoids found in <i>Zostera marina</i>                                                                                                             | 2  |
| <b>Computational details</b> (including <b>Figures S1-S2</b> ) |                                                                                                                                                             | 3  |
| <b>Figure S3</b>                                               | Deviations of calculated <sup>13</sup> C and <sup>1</sup> H NMR chemical shifts of zosterabisphenone C ( <b>1</b> ) and its C-9 epimer <i>epi-1</i>         | 5  |
| <b>Figure S4</b>                                               | High-resolution ESI mass spectrum of zosterabisphenone C ( <b>1</b> )                                                                                       | 6  |
| <b>Figure S5</b>                                               | <sup>1</sup> H NMR spectrum of zosterabisphenone C ( <b>1</b> ) recorded at 298 K and 253 K (700 MHz, CDCl <sub>3</sub> )                                   | 7  |
| <b>Figure S6</b>                                               | <sup>13</sup> C NMR spectrum of zosterabisphenone C ( <b>1</b> ) recorded at 253 K (175 MHz, CDCl <sub>3</sub> )                                            | 8  |
| <b>Figure S7</b>                                               | HSQC spectrum of zosterabisphenone C ( <b>1</b> ) recorded at 253 K (700 MHz, CDCl <sub>3</sub> )                                                           | 9  |
| <b>Figure S8</b>                                               | HMBC spectrum of zosterabisphenone C ( <b>1</b> ) recorded at 253 K (700 MHz, CDCl <sub>3</sub> )                                                           | 10 |
| <b>Figure S9</b>                                               | Expansion of the HMBC spectrum of zosterabisphenone C ( <b>1</b> ) recorded at 253 K (700 MHz, CDCl <sub>3</sub> )                                          | 11 |
| <b>Figure S10</b>                                              | COSY spectrum of zosterabisphenone C ( <b>1</b> ) recorded at 253 K (700 MHz, CDCl <sub>3</sub> )                                                           | 12 |
| <b>Figure S11</b>                                              | ROESY spectrum of zosterabisphenone C ( <b>1</b> ) recorded at 253 K (700 MHz, CDCl <sub>3</sub> )                                                          | 13 |
| <b>Figure S12</b>                                              | Calculated and experimental UV and ECD spectra of zosterabisphenone C ( <b>1</b> ) in acetonitrile                                                          | 14 |
| <b>Figure S13</b>                                              | IR spectrum of zosterabisphenone C ( <b>1</b> ) (solid film)                                                                                                | 15 |
| <b>Table S1</b>                                                | Cartesian coordinates of the lowest-energy conformer of zosterabisphenone C ( <b>1</b> )                                                                    | 16 |
| <b>Table S2</b>                                                | Cartesian coordinates of the lowest-energy conformers of the C-9 epimer of zosterabisphenone C ( <i>epi-1</i> )                                             | 17 |
| <b>Table S3</b>                                                | Experimental and predicted chemical shifts of zosterabisphenone C ( <b>1</b> )                                                                              | 18 |
| <b>Table S4</b>                                                | Experimental and predicted chemical shifts of the two conformers of the C-9 epimer of zosterabisphenone C ( <i>epi-1</i> )                                  | 19 |
| <b>Table S5</b>                                                | Experimental multiplicity of <sup>1</sup> H NMR signals and predicted <sup>1</sup> H- <sup>1</sup> H <i>J</i> couplings of zosterabisphenone C ( <b>1</b> ) | 20 |
| <b>Table S6</b>                                                | Rotatory strengths (length formalism) calculated for zosterabisphenone C ( <b>1</b> )                                                                       | 21 |
| <b>Table S7</b>                                                | Effects of zosterabisphenone A ( <b>4</b> ), B ( <b>5</b> ), and C ( <b>1</b> ) on the viability of HCT116 and Hep G2 cells after 48 hours of treatment     | 22 |
| <b>References</b>                                              |                                                                                                                                                             | 22 |

Chart S1. Diarylheptanoid found in *Zostera marina*

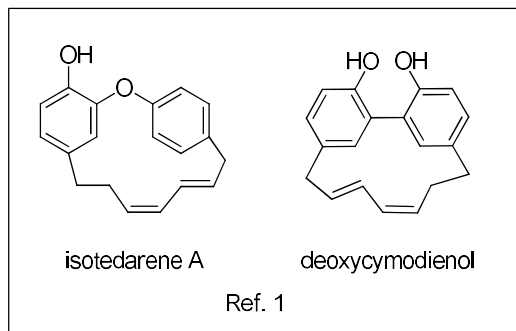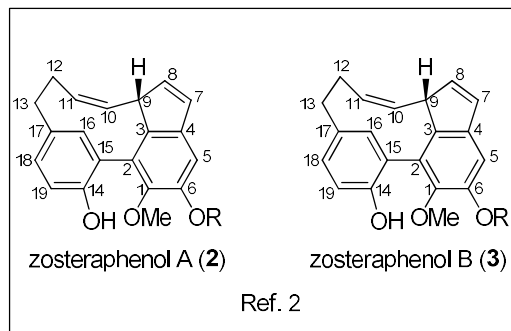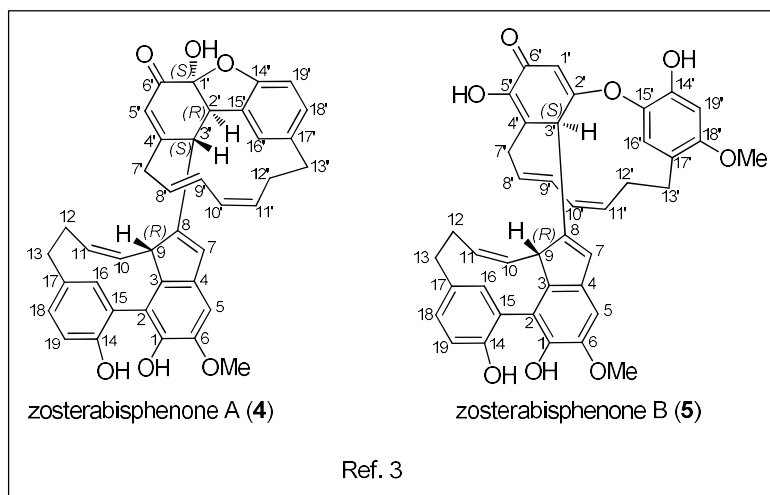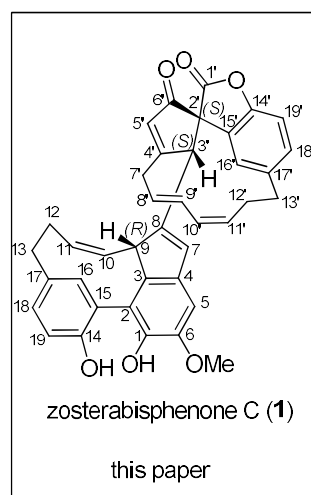

## Additional Computational Details

A simplified model (**1n**) of the northern diarylheptanoid unit of zosterabisphenone C, with the southern unit replaced by a phenyl ring and with the relative configuration at C-2', and C-3' as determined by NMR studies (the 2'*S*,3'*S* enantiomer was tentatively used, Figure S1) was subjected to molecular dynamics (MD) conformational search. The MD simulation was set at 2000 K to allow possible slow conformational changes to occur in the 10-ns duration of the simulation.<sup>3</sup> This identified 5 unique conformers in a range of 6.93 kcal/mol, whose geometry was optimized by DFT at the B3LYP/6-31+G(d,p) level. The lowest-energy conformer was in full agreement with the ROESY data (Table 1, main text), while the remaining 4 conformers had remarkably higher energies ( $\Delta E > 2.2$  kcal/mol compared to the lowest-energy conformer) and were not considered further.

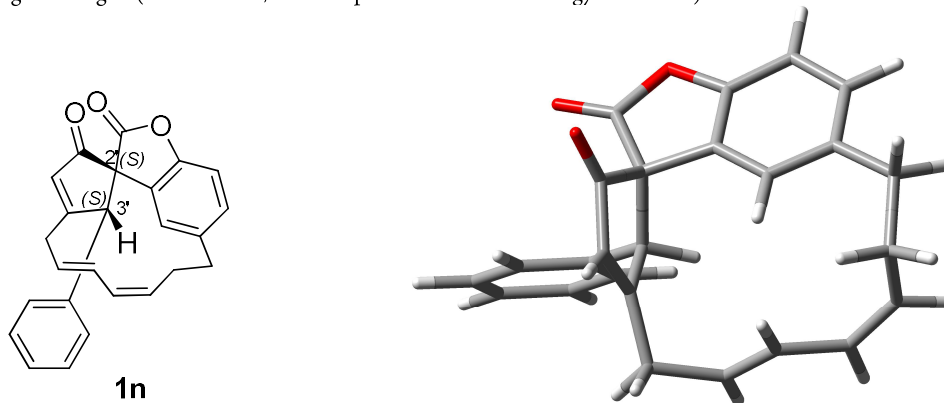

**Figure S1.** The simplified model compound **2n** for the northern diarylheptanoid unit of unit of zosterabisphenone C and its lowest-energy conformation at the B3LYP/6-31+G(d,p) level.

The favored conformation of the southern diarylheptanoid unit, which is identical for all zosterabisphenones, was known from our previous study<sup>3</sup> and confirmed by ROESY data (Figure 1 and Table 1 in the main text).

Therefore, the two possible diastereomers of zosterabisphenone C were generated by replacing the phenyl group of **1n** with either enantiomer of the southern unit, to give **1** (the 9*R*,2'*S*,3'*S* stereoisomer) and *epi*-**1** (the 9*S*,2'*S*,3'*S* stereoisomer). The torsion angle around the C-8/C-3' bond was unknown, so a conformational search for this degree of freedom was performed using a relaxed energy surface scan in Gaussian 16 (ModRedundant keyword). The dihedral angle C-9/C-8/C-3'/C-2' was incremented in steps of 10° and kept fixed while the geometry of the rest of the molecule was optimized at the B3LYP/6-31G(d) level. The resulting graph of the potential energy vs. dihedral angle (Figure S2) showed one low energy conformer for **1** and two low-energy conformers for *epi*-**1**.

Finally, the conformers of **1** and *epi*-**1** were reoptimized at the B3LYP/6-31+G(d,p) level, and the resulting geometries (Tables S1 and S2) were used for NMR (Tables S3-S5, Figure S3) and ECD (Table S6, Figure S12) prediction. The results are discussed in the main text.

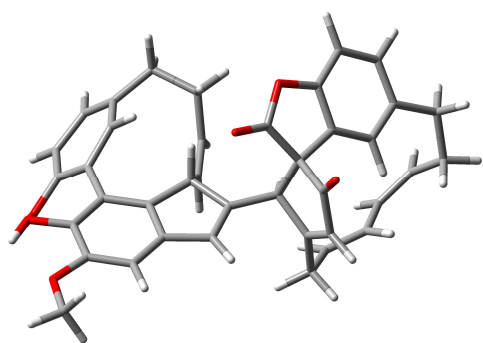

1, conformer 1

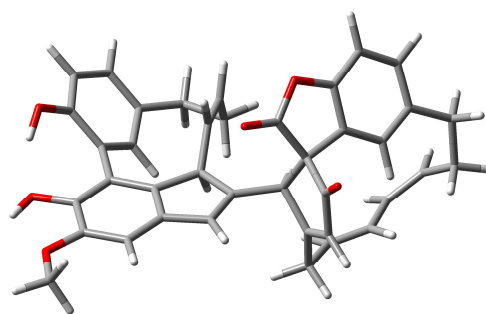

*epi-1*, conformer 1

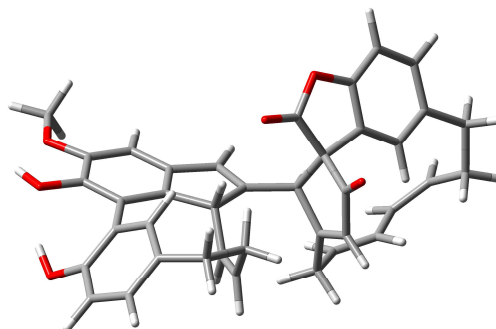

*epi-1*, conformer 2

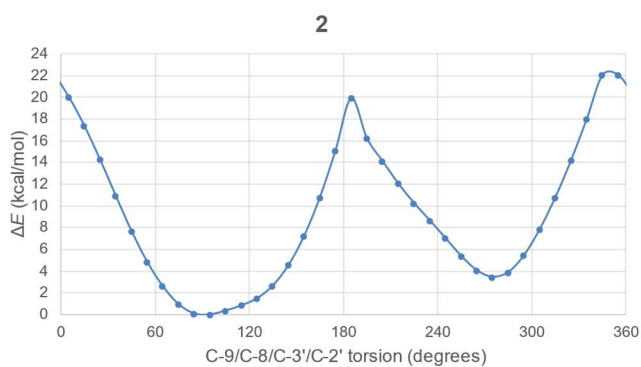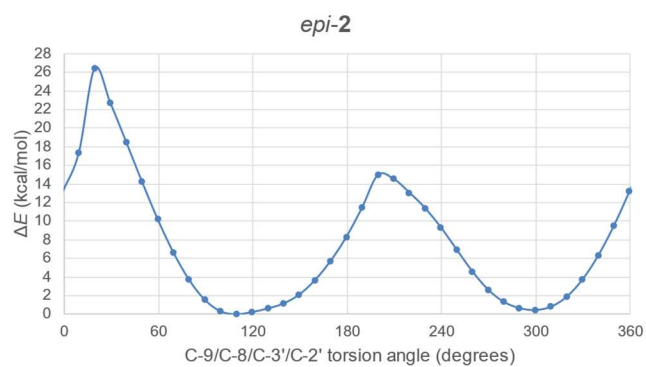

**Figure S2.** DFT energy of zosterabisphephone C (**1**) and its C-9 epimer *epi-1* as a function of the torsion angle about the C-9/C-8/C-3'/C-2' bond, i.e. the bond that connects the two cyclic diarylheptanoid units. The significantly populated minimum energy conformations are shown above the graphs.

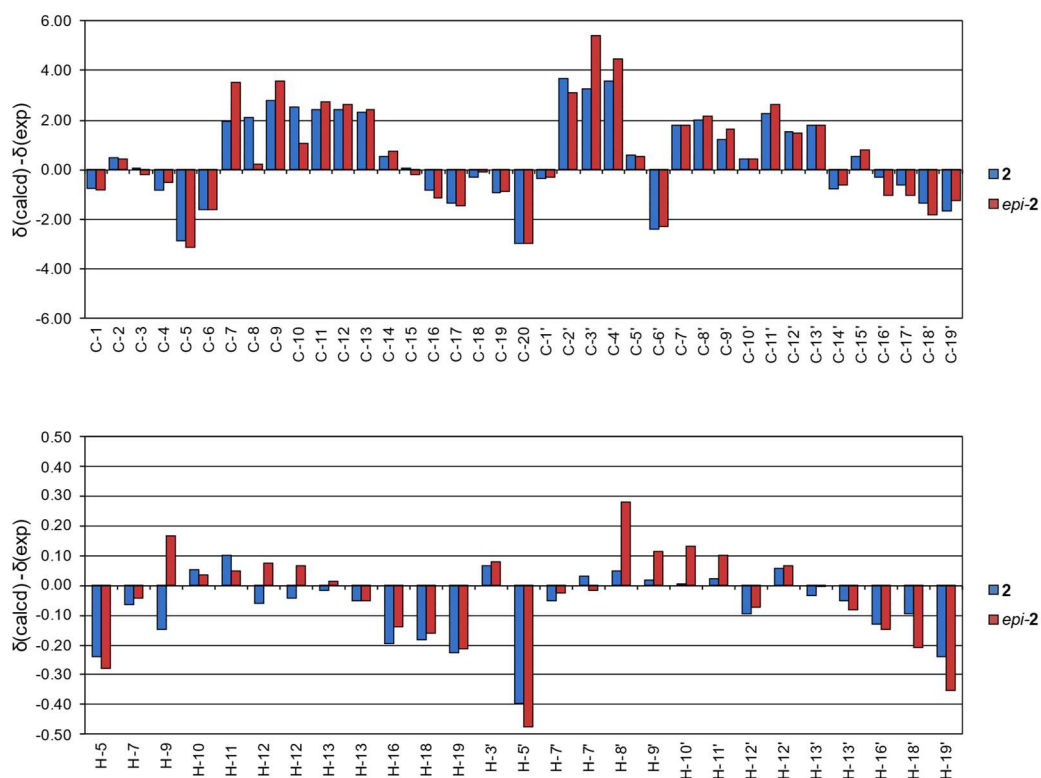

**Figure S3.** Deviations from experimental values of calculated  $^{13}\text{C}$  (top panel) and  $^1\text{H}$  (bottom panel) NMR chemical shifts of zosterabisphenone C (**1**) and its C-9 epimer *epi-1*.

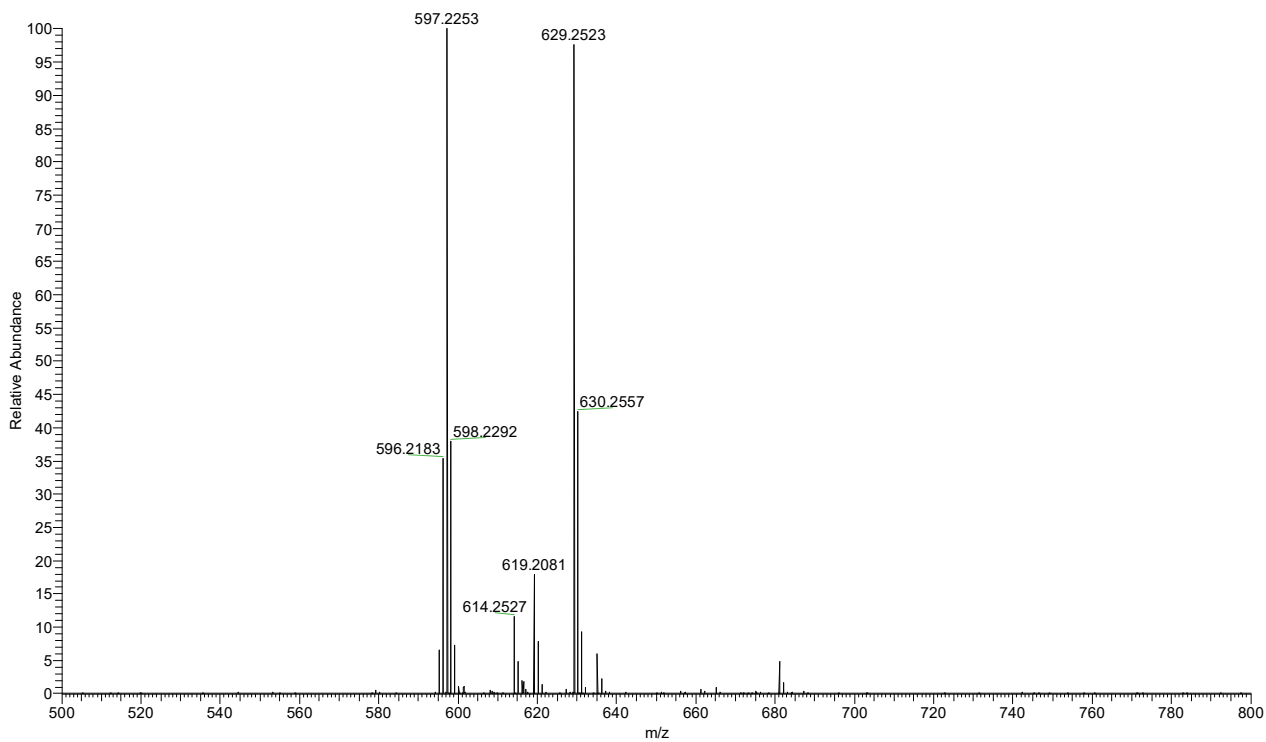

**Figure S4.** High-resolution ESI mass spectrum of zosterabispheone C (**1**) (positive ion mode, MeOH/0.1% aqueous HCOOH).

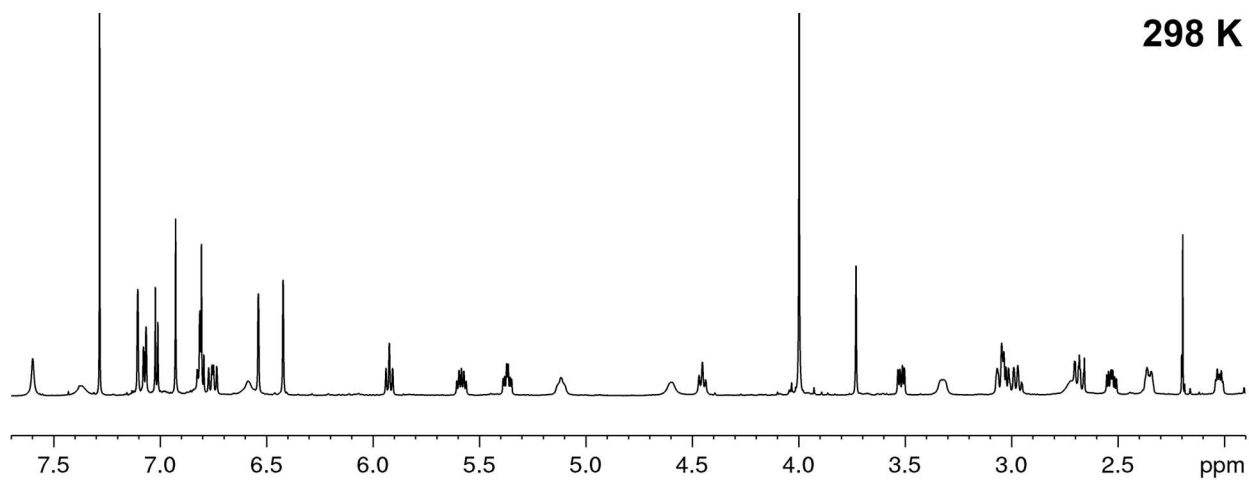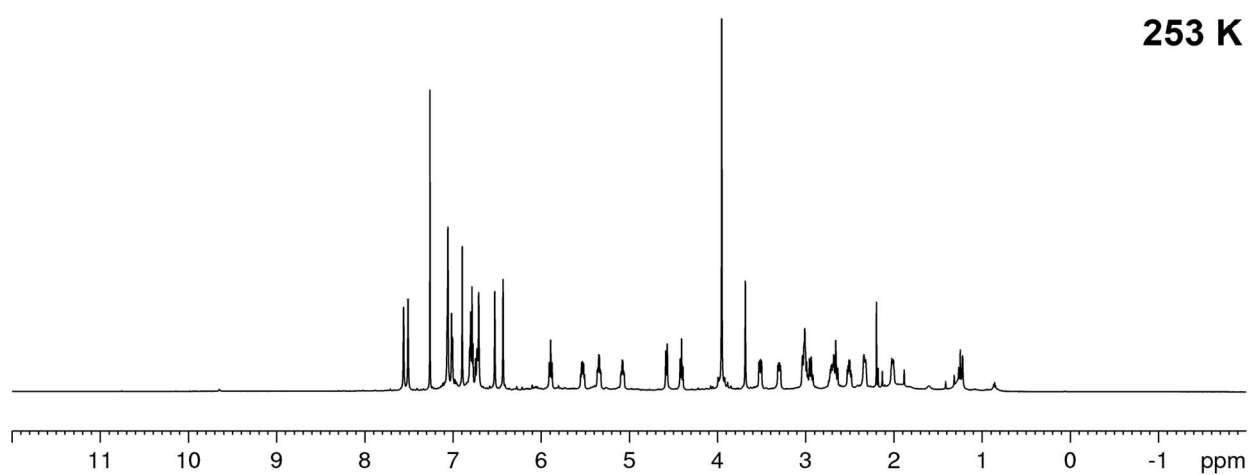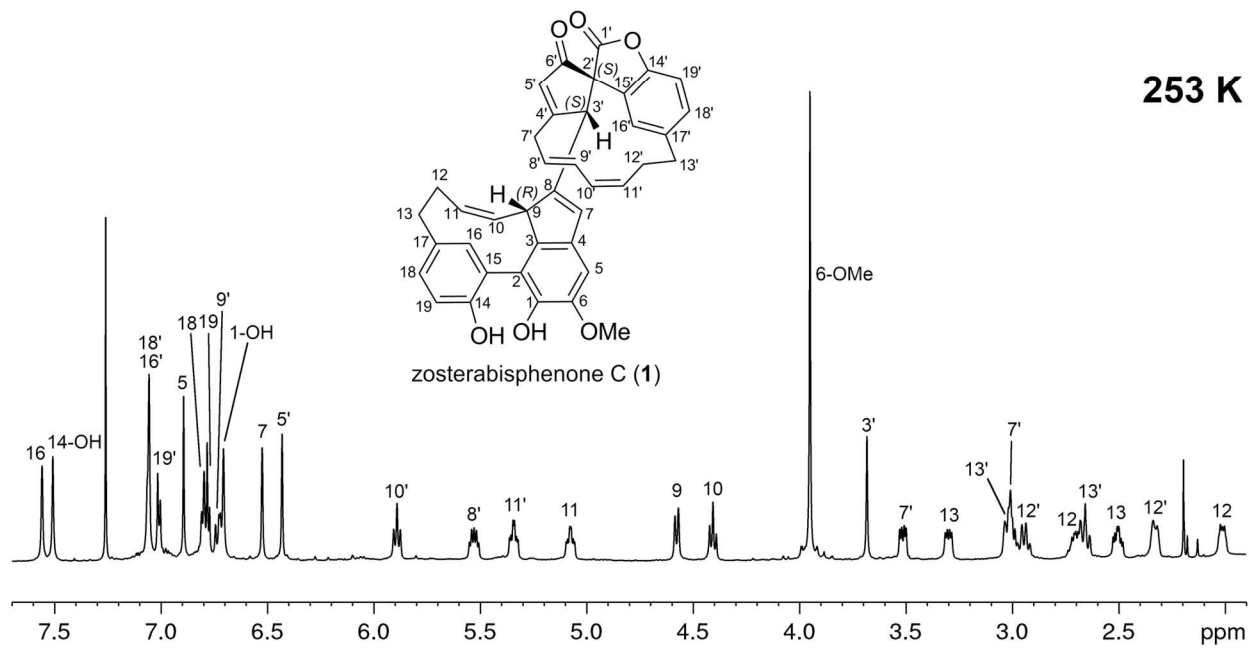

**Figure S5.**  $^1\text{H}$  NMR spectrum of zosterabisphenone C (**1**) recorded at 298 K and 253 K (700 MHz,  $\text{CDCl}_3$ )

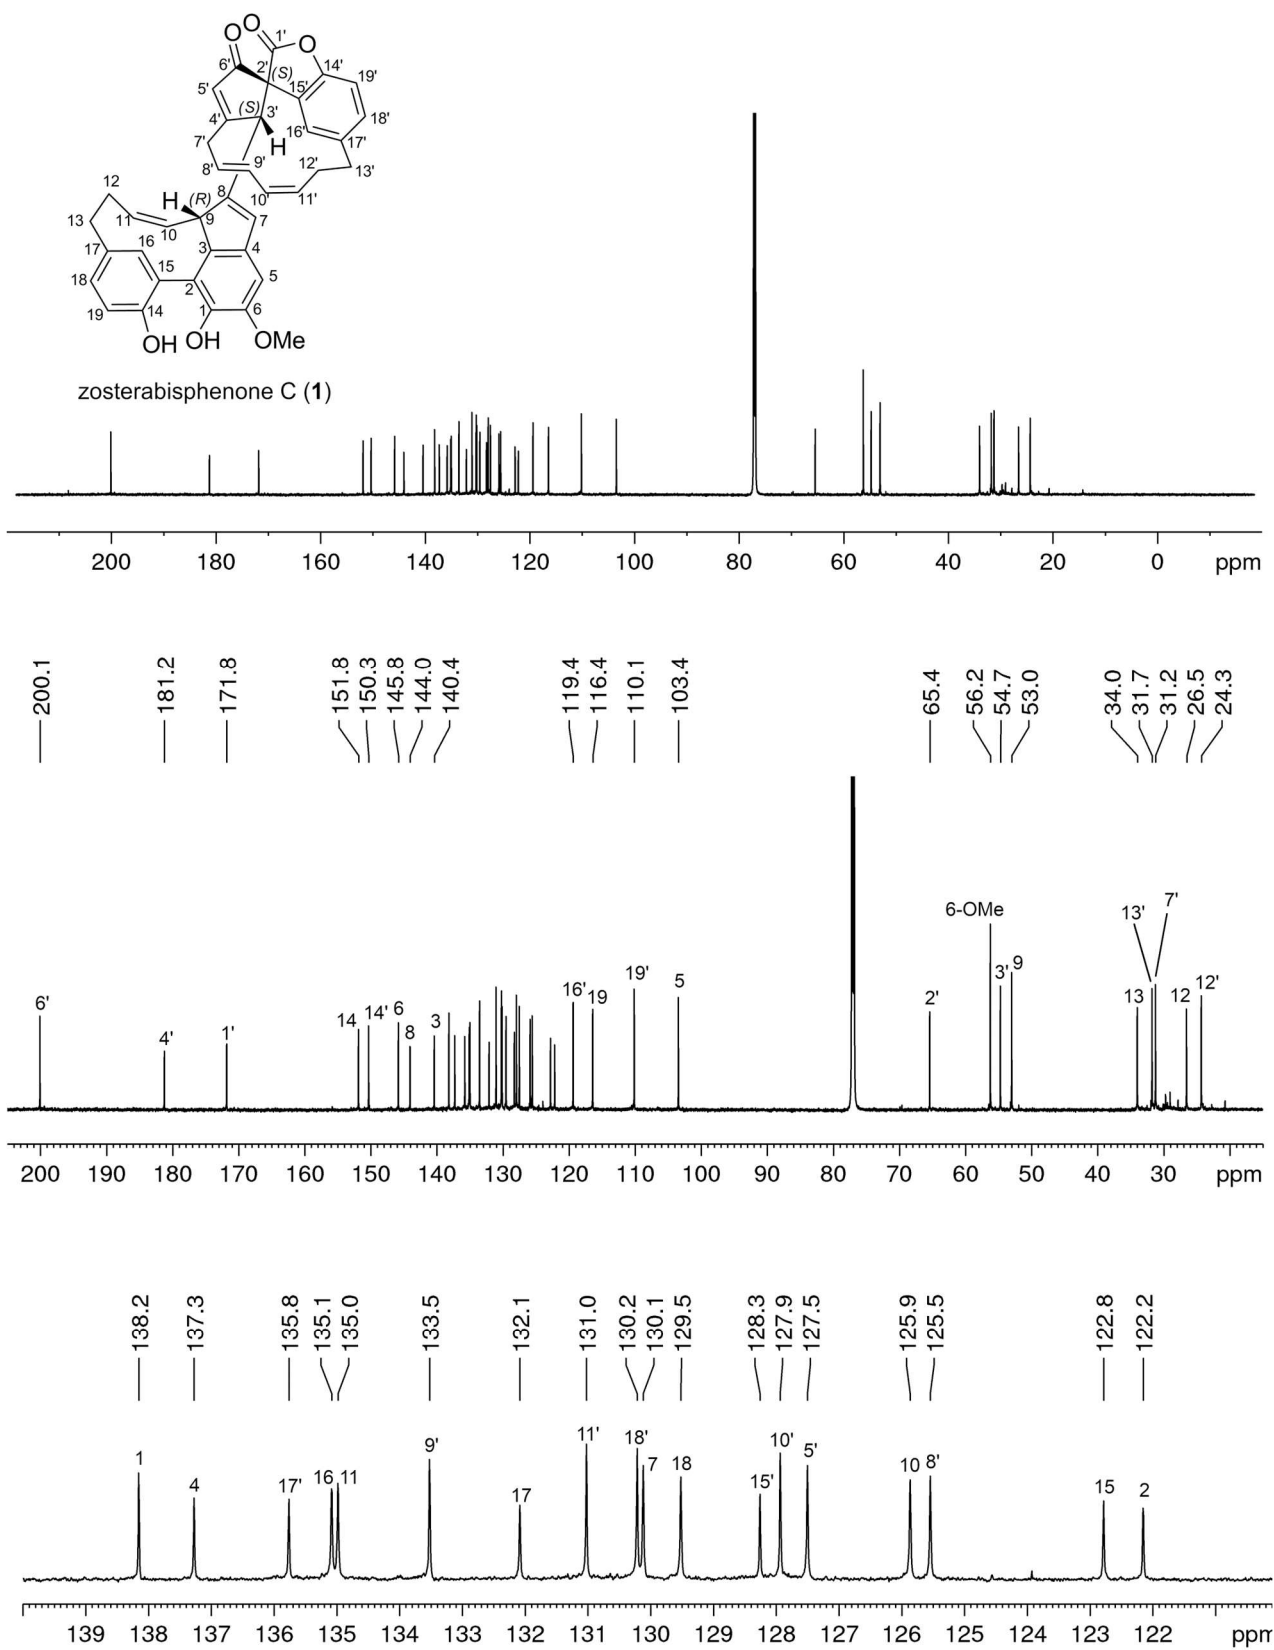

Figure S6. <sup>13</sup>C NMR spectrum of zosterabisphenone C (1) recorded at 253 K (700 MHz, CDCl<sub>3</sub>)



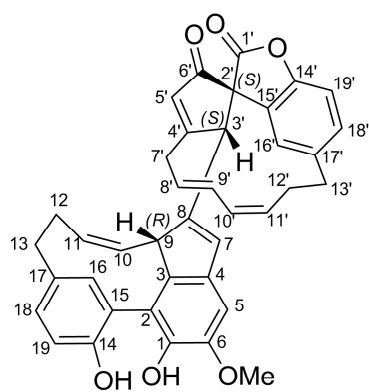

zosterabisphephenone C (1)

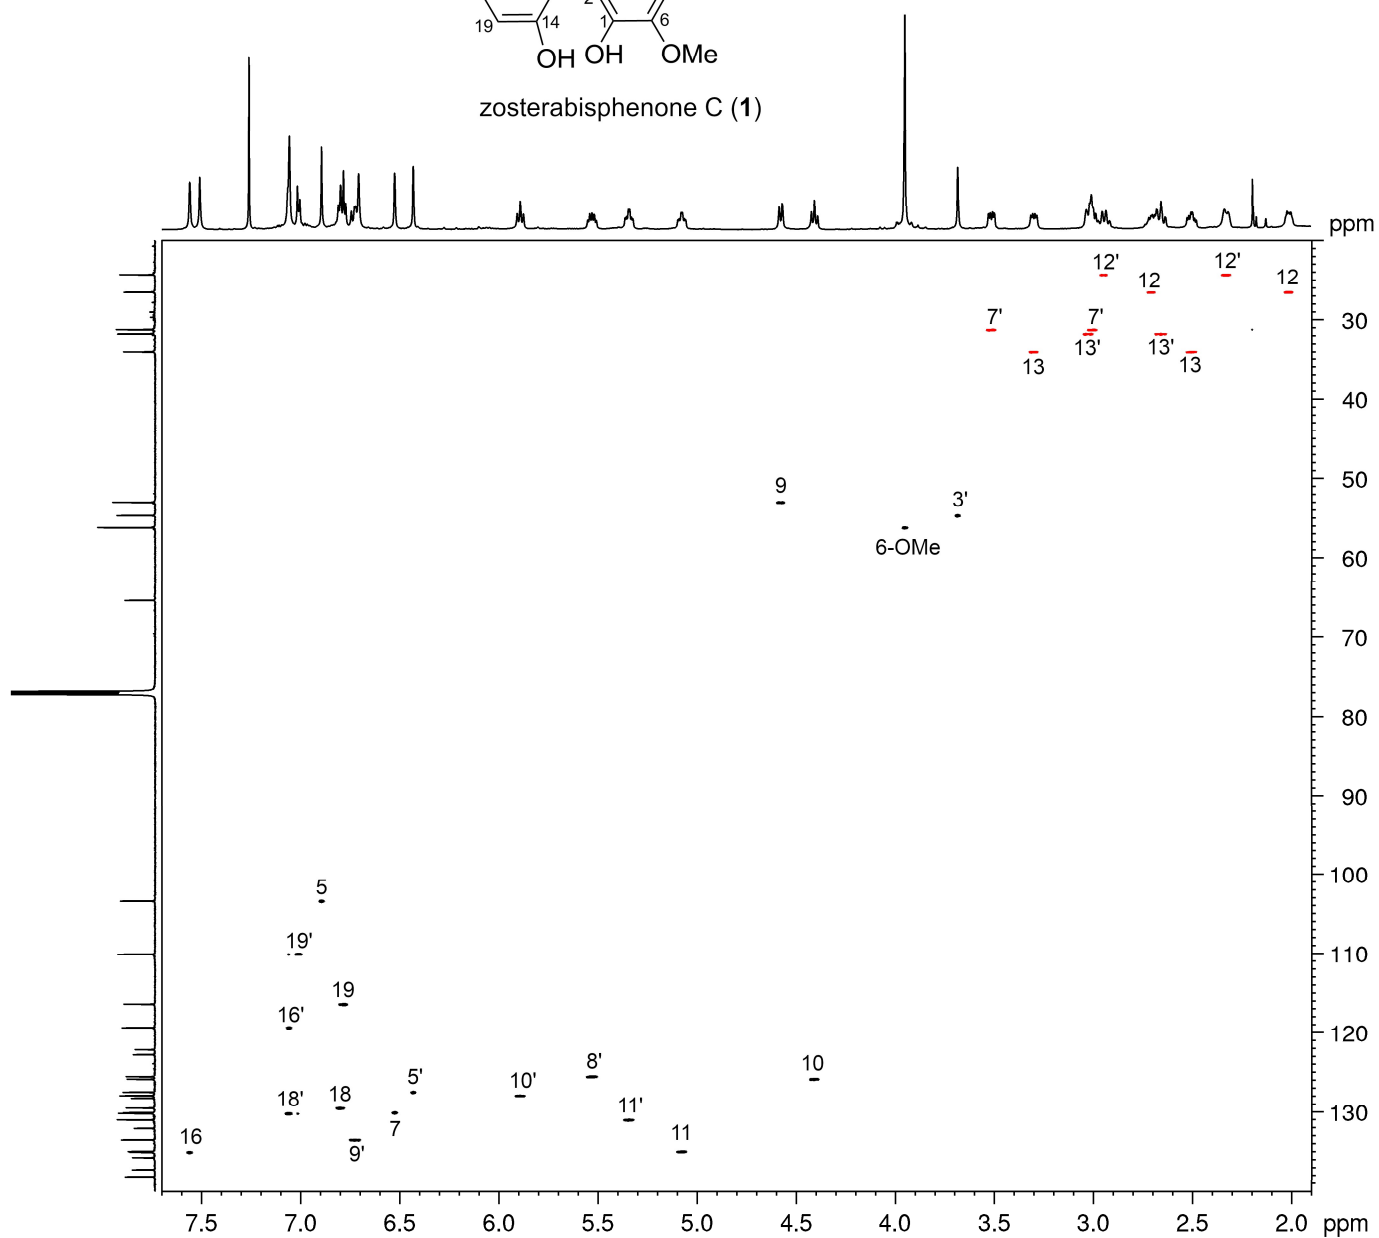

Figure S7. HSQC spectrum of zosterabisphephenone C (1) recorded at 253 K (700 MHz, CDCl<sub>3</sub>)

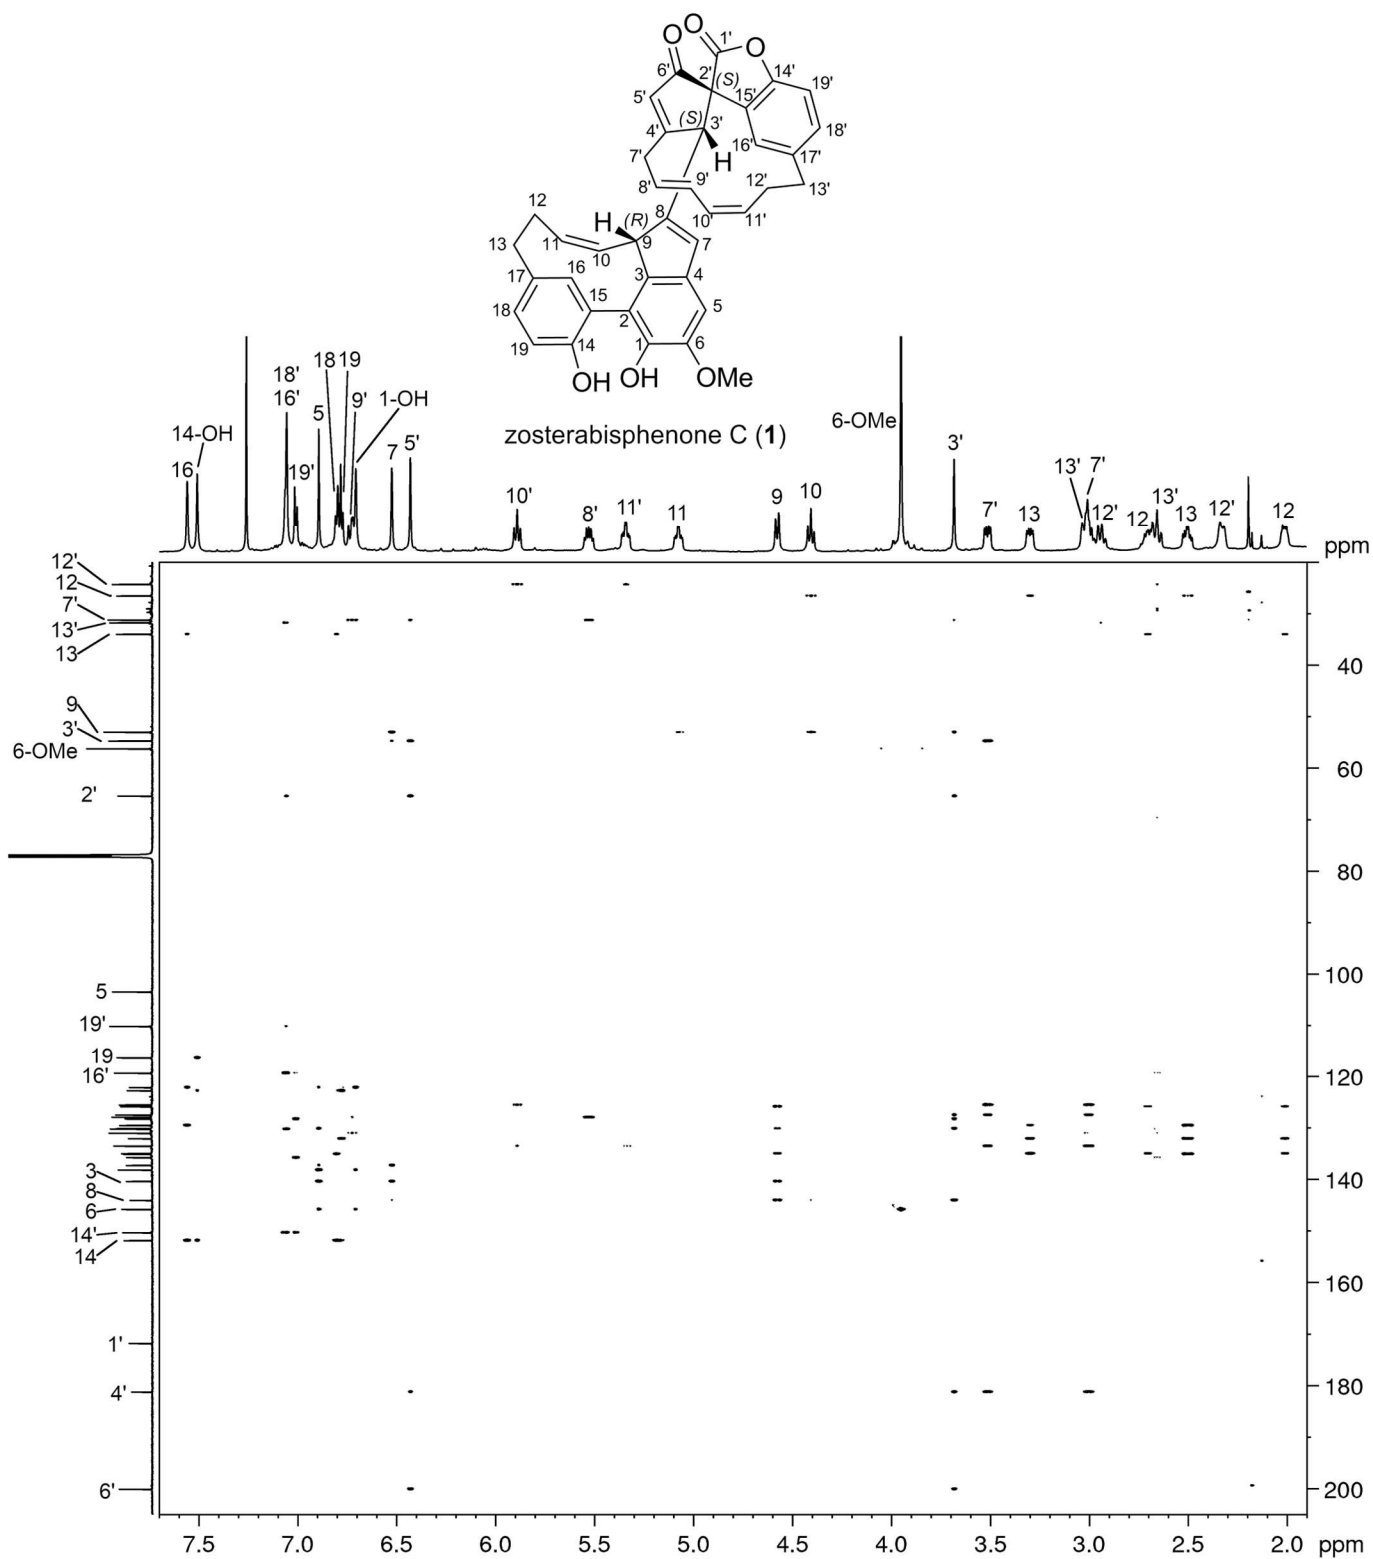

Figure S8. HMBC spectrum of zosterabisphenone C (1) recorded at 253 K (700 MHz, CDCl<sub>3</sub>)

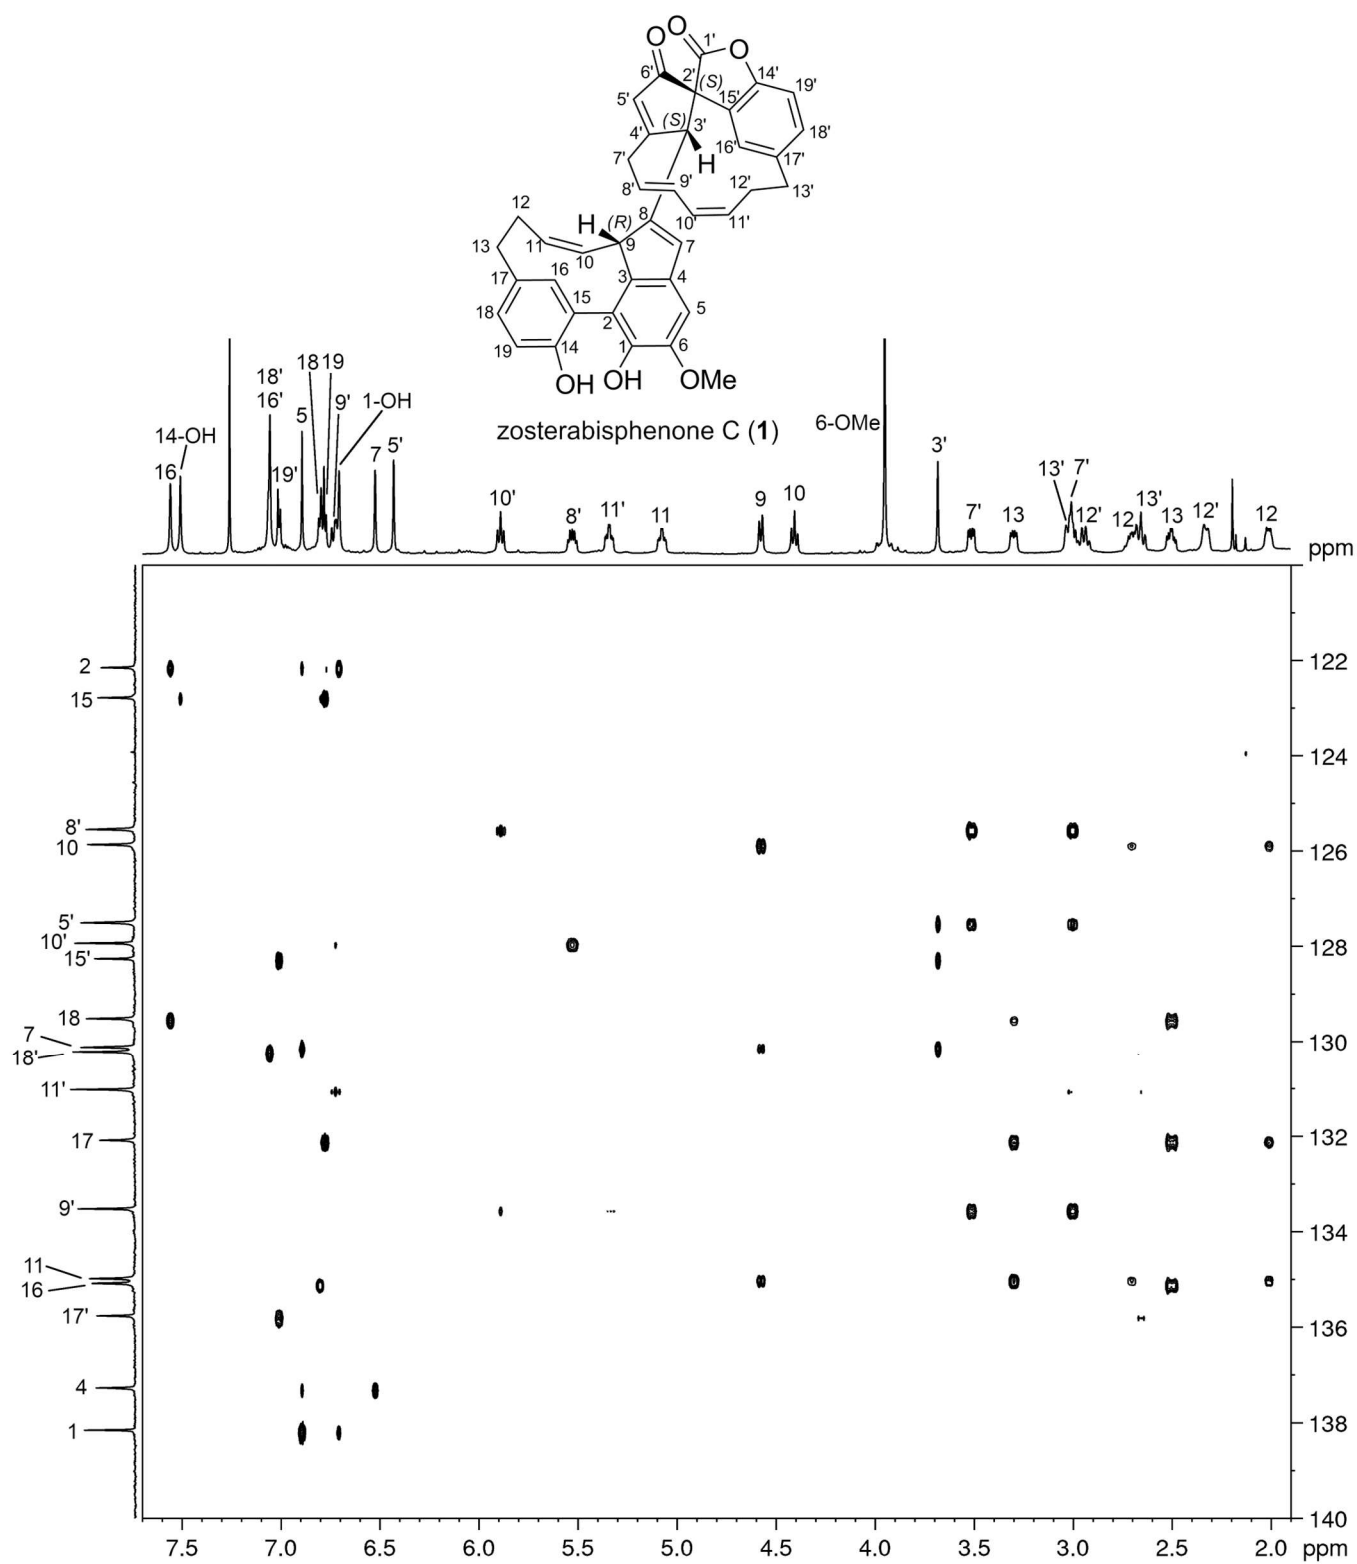

**Figure S9.** Expansion of the HMBC spectrum of zosterabisphenone C (1) recorded at 253 K (700 MHz,  $\text{CDCl}_3$ )

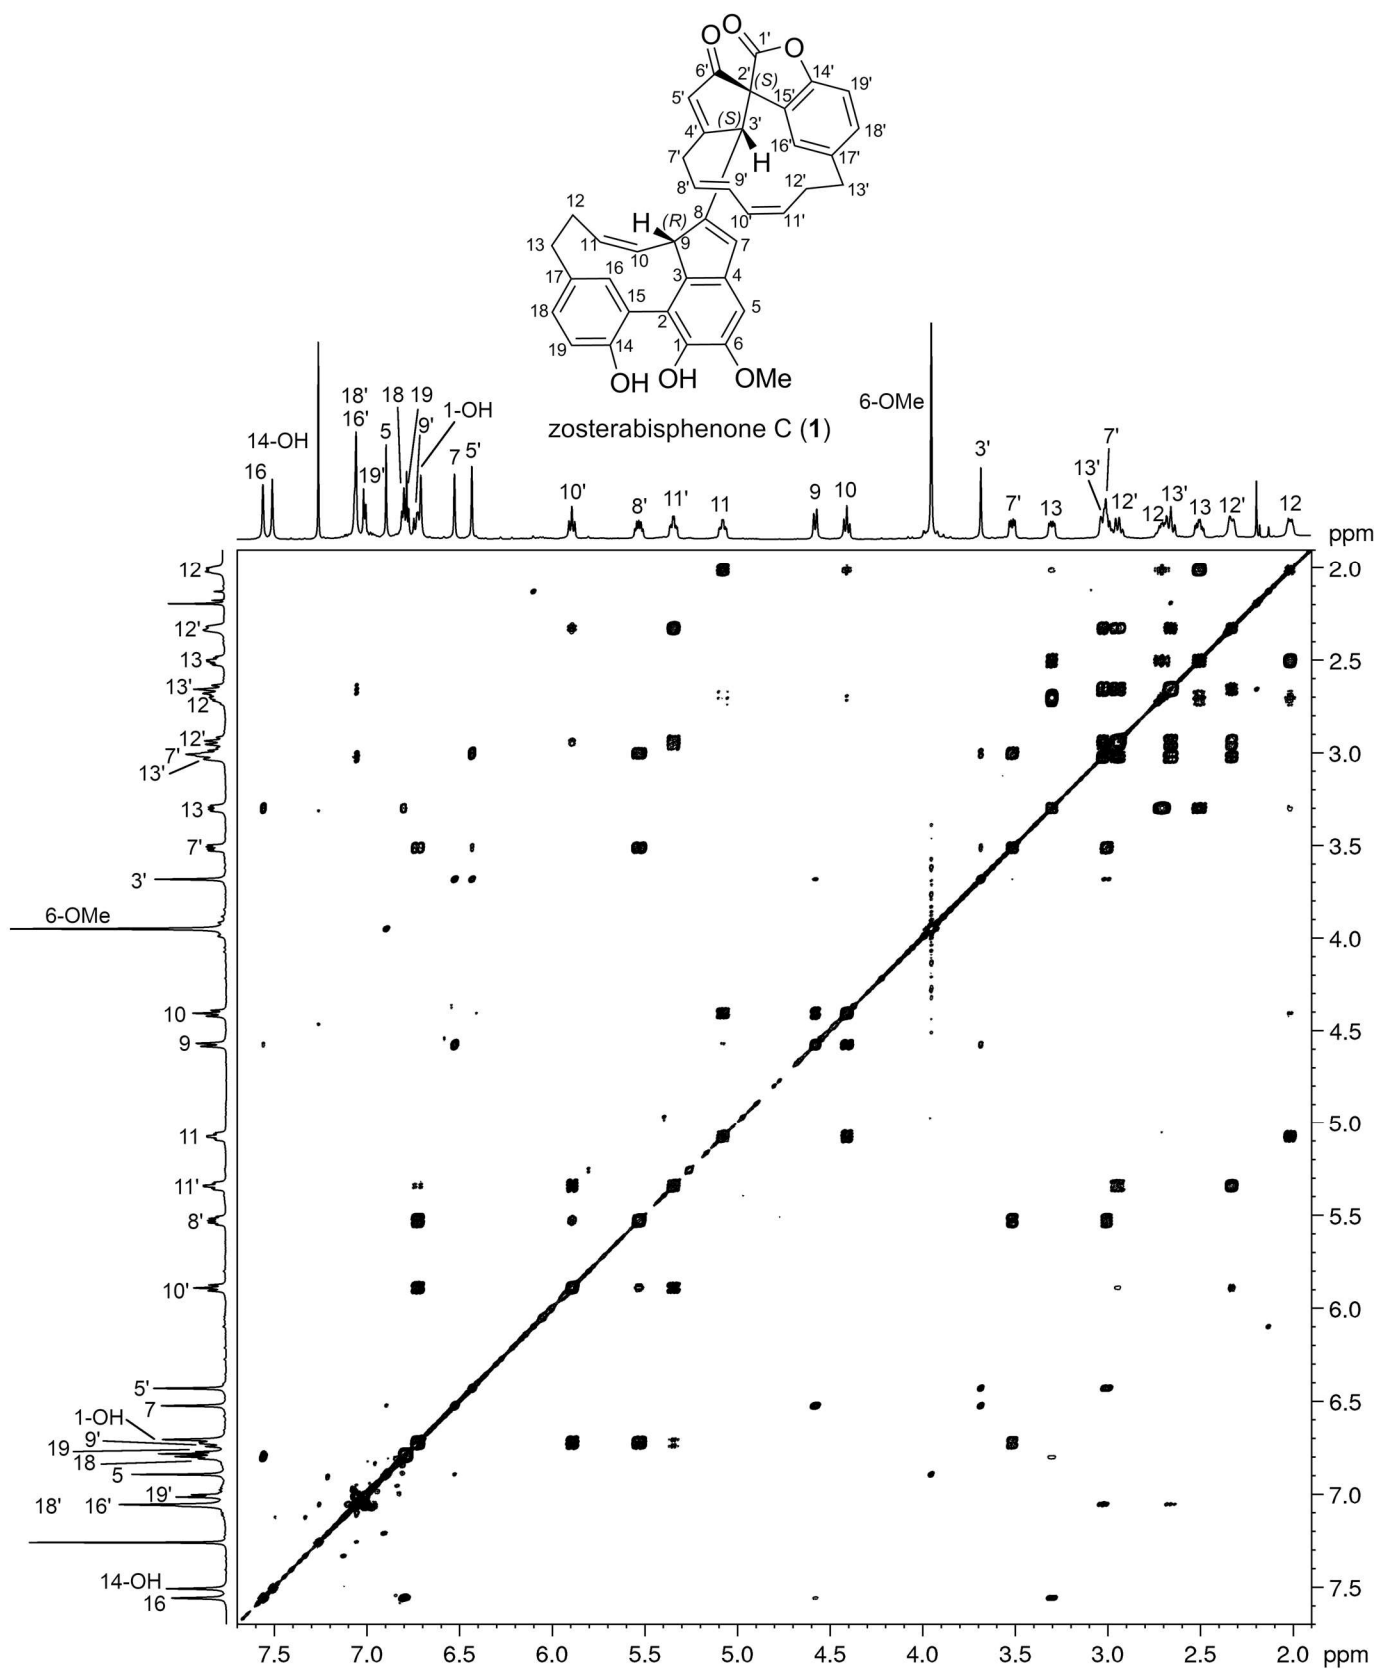

Figure S10. COSY spectrum of zosterabisphephone C (1) recorded at 253 K (700 MHz, CDCl<sub>3</sub>)

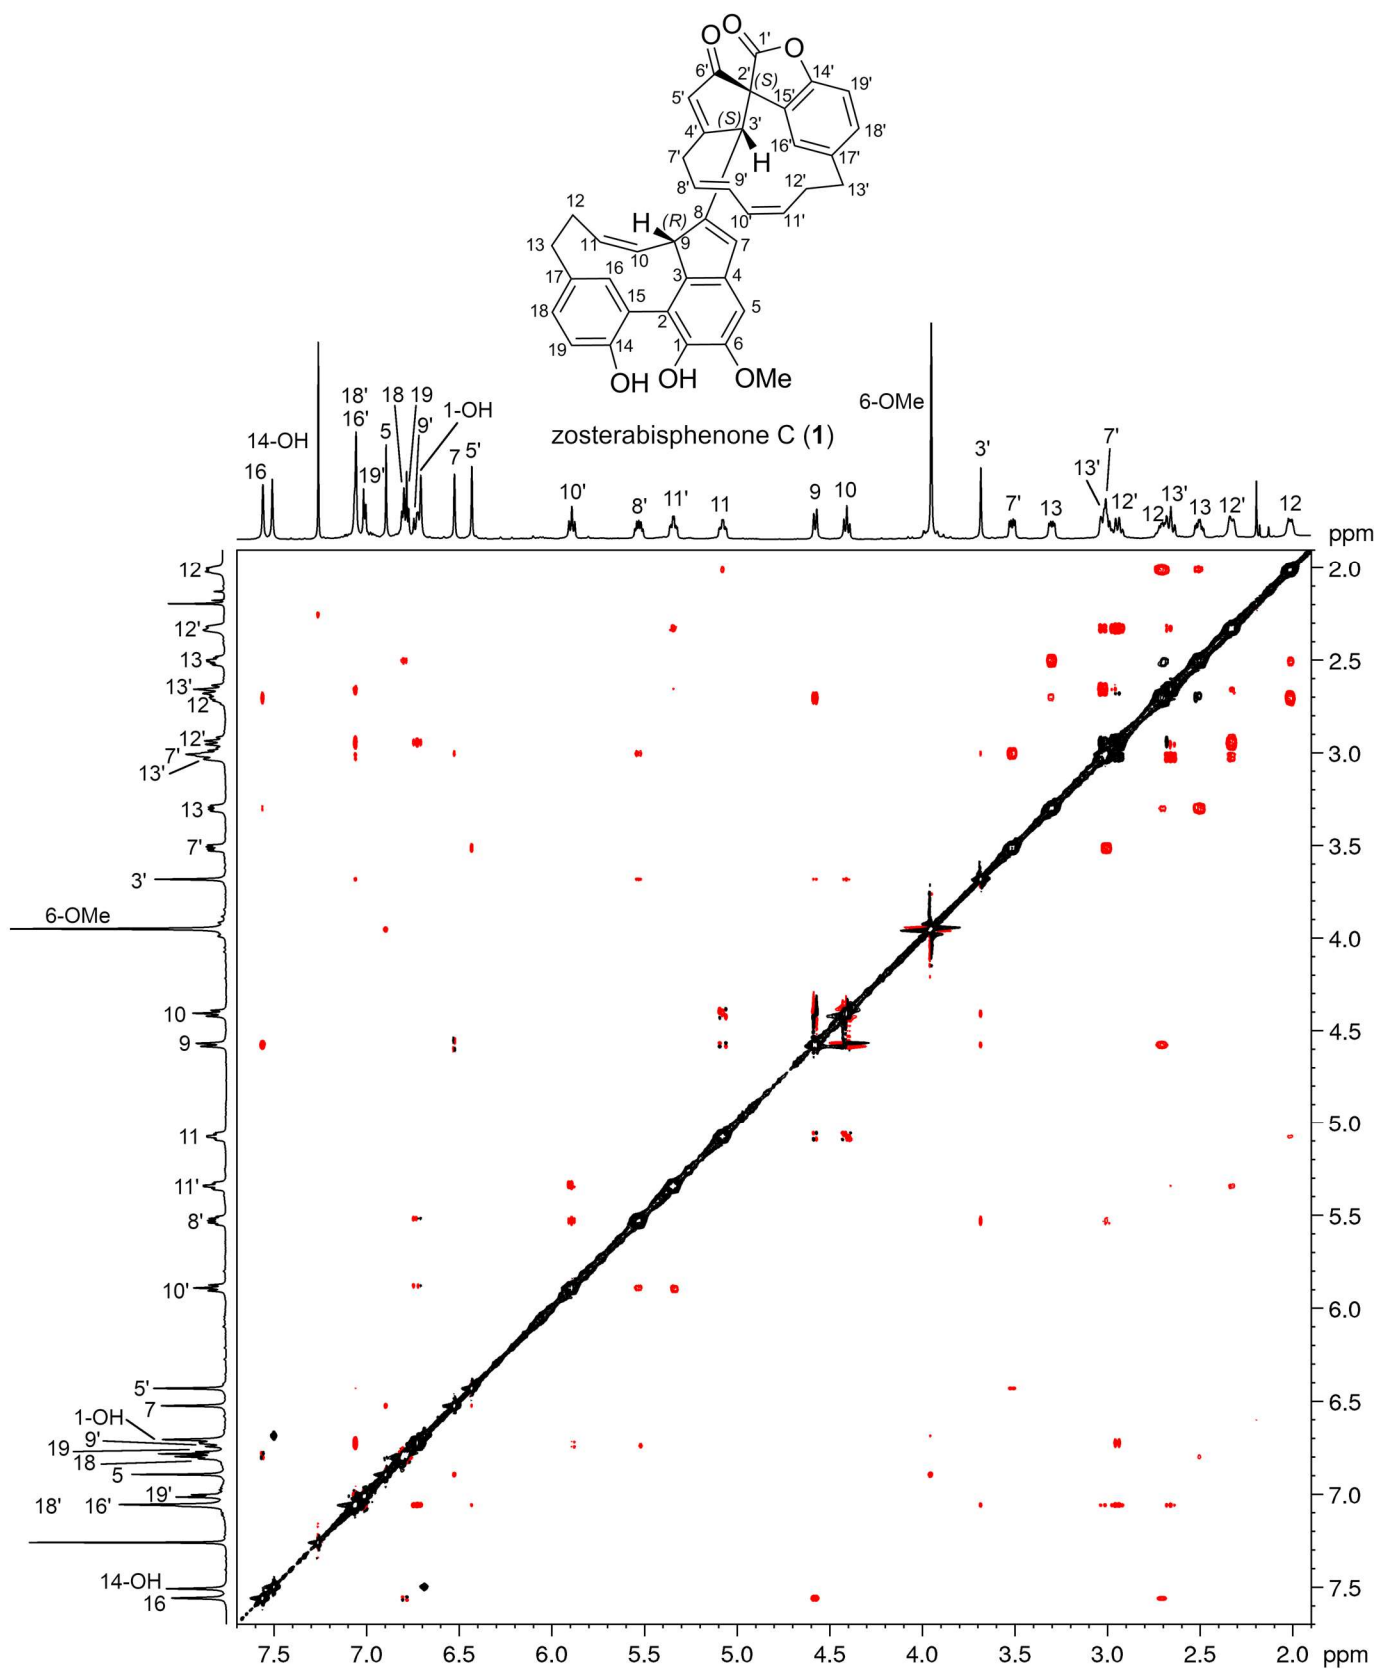

Figure S11. ROESY spectrum of zosterabisphenone C (1) recorded at 253 K (700 MHz, CDCl<sub>3</sub>)

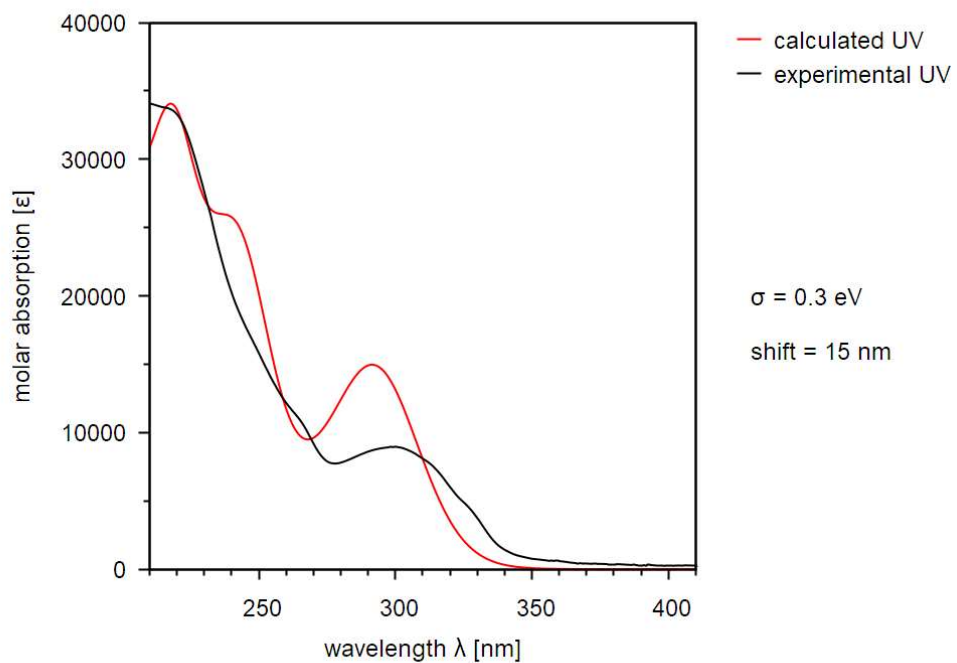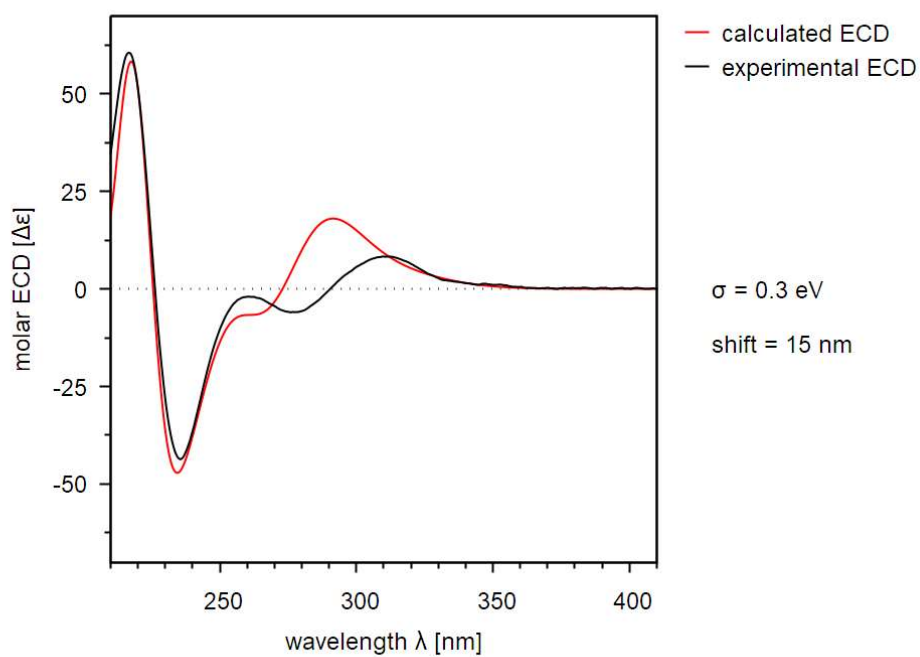

**Figure S12.** Top panel: calculated and experimental UV spectra of zosterabisphenone C (**1**) in acetonitrile; bottom panel: calculated and experimental ECD spectra of zosterabisphenone C (**1**) in acetonitrile.

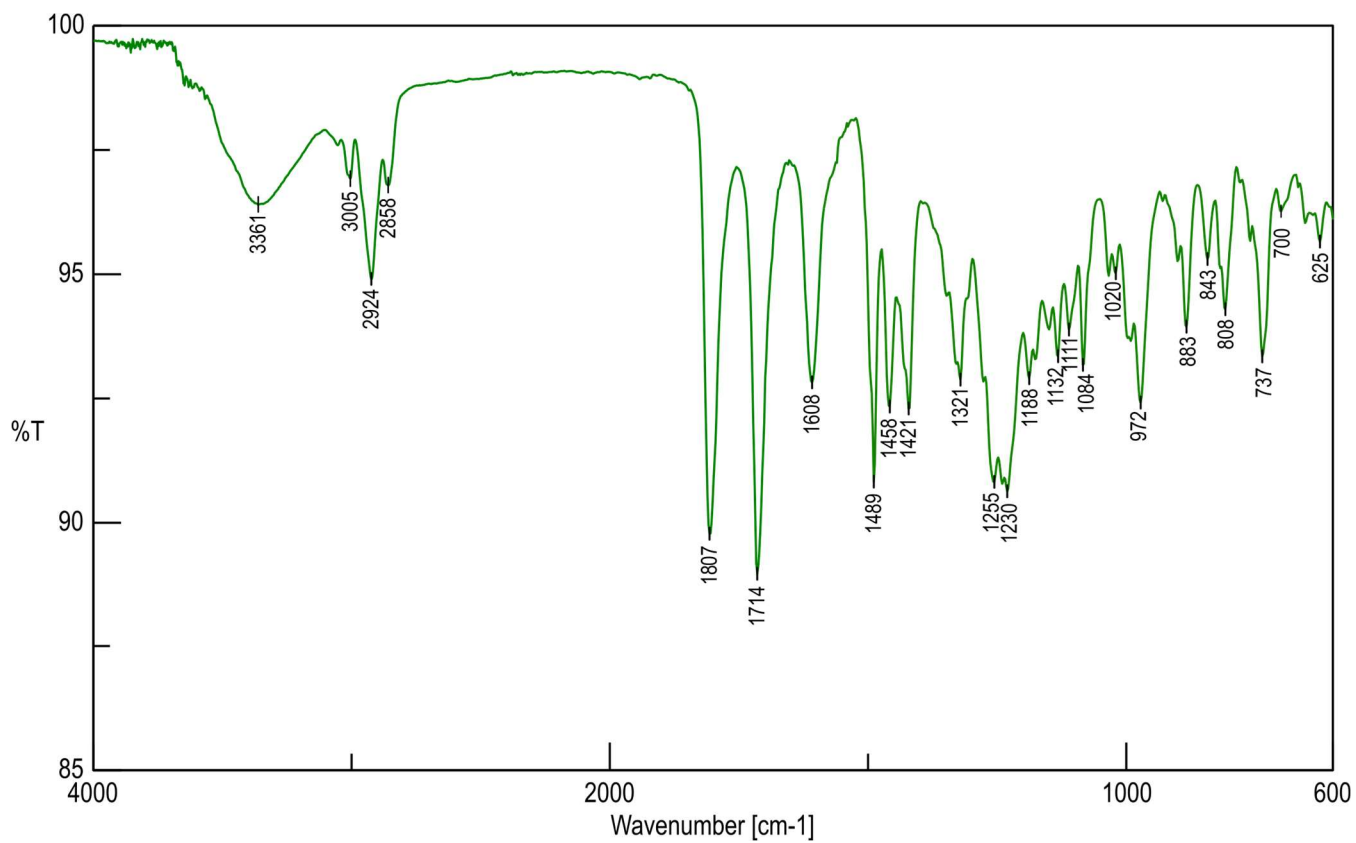

**Figure S13.** IR spectrum of zosterabispnone C (1) (solid film)

**Table S1.** Cartesian coordinates of the lowest-energy conformer of zosterabisphenone C (**1**) optimized at the B3LYP/6-31+G(d,p) level.

| conformer 1, $E = -1956.7878077$ Hartrees |                 |          |          |
|-------------------------------------------|-----------------|----------|----------|
|                                           | >99% population |          |          |
| C                                         | 4.86191         | -0.78656 | -0.06881 |
| C                                         | 3.76849         | 0.09374  | -0.05490 |
| C                                         | 2.48645         | -0.50162 | 0.04945  |
| C                                         | 2.35377         | -1.89793 | 0.17152  |
| C                                         | 3.45983         | -2.75697 | 0.16403  |
| C                                         | 4.71884         | -2.18321 | 0.03475  |
| C                                         | 0.94158         | -2.24190 | 0.28924  |
| C                                         | 0.18166         | -1.12891 | 0.21438  |
| C                                         | 1.06885         | 0.10289  | 0.00780  |
| C                                         | 0.73993         | 1.23455  | 0.96197  |
| C                                         | 0.32271         | 2.47650  | 0.65752  |
| C                                         | 0.18062         | 3.11477  | -0.70597 |
| C                                         | 1.31461         | 4.15034  | -1.03143 |
| C                                         | 4.77193         | 2.31901  | 0.76982  |
| C                                         | 3.92352         | 1.57729  | -0.08883 |
| C                                         | 2.97607         | 2.29553  | -0.82689 |
| C                                         | 2.66870         | 3.63318  | -0.58698 |
| C                                         | 3.49800         | 4.33565  | 0.29544  |
| C                                         | 4.57089         | 3.69748  | 0.91726  |
| C                                         | 5.88893         | -4.28627 | 0.04776  |
| C                                         | -1.31628        | -0.83326 | -2.37871 |
| C                                         | -2.08899        | -1.23252 | -1.11567 |
| C                                         | -1.32505        | -1.03058 | 0.25962  |
| C                                         | -1.92672        | -2.13710 | 1.12009  |
| C                                         | -2.50378        | -3.09943 | 0.37241  |
| C                                         | -2.50791        | -2.73419 | -1.05487 |
| C                                         | -1.88009        | -2.05928 | 2.62758  |
| C                                         | -2.55511        | -0.77671 | 3.09464  |
| C                                         | -3.86527        | -0.52703 | 2.91673  |
| C                                         | -4.48878        | 0.77709  | 3.11332  |
| C                                         | -5.63782        | 1.20313  | 2.54813  |
| C                                         | -6.56782        | 0.44336  | 1.63712  |
| C                                         | -6.61792        | 0.97824  | 0.18164  |
| C                                         | -3.12888        | 0.50842  | -2.30164 |
| C                                         | -3.30191        | -0.33377 | -1.21077 |
| C                                         | -4.42894        | -0.20443 | -0.40867 |
| C                                         | -5.36316        | 0.81077  | -0.66536 |
| C                                         | -5.13925        | 1.65851  | -1.76494 |
| C                                         | -4.02922        | 1.51597  | -2.60988 |
| H                                         | 3.32898         | -3.82940 | 0.24950  |
| H                                         | 0.57438         | -3.25763 | 0.39239  |
| H                                         | 0.88107         | 0.43539  | -1.02080 |
| H                                         | 0.84513         | 0.97991  | 2.01658  |
| H                                         | 0.12910         | 3.14286  | 1.49907  |
| H                                         | -0.78526        | 3.63218  | -0.76979 |
| H                                         | 0.16469         | 2.35069  | -1.48895 |
| H                                         | 1.10859         | 5.09565  | -0.51604 |
| H                                         | 1.27589         | 4.36526  | -2.10744 |
| H                                         | -4.57051        | -0.88370 | 0.41939  |
| H                                         | 2.36133         | 1.73873  | -1.52232 |
| H                                         | -5.85343        | 2.45077  | -1.97538 |
| H                                         | 3.29239         | 5.37929  | 0.52277  |
| H                                         | -3.87421        | 2.17000  | -3.46100 |
| H                                         | 5.23135         | 4.23626  | 1.58932  |
| H                                         | -1.58958        | -0.04708 | 0.66039  |
| H                                         | -2.95015        | -4.02046 | 0.73128  |
| H                                         | -2.37079        | -2.94330 | 3.05016  |
| H                                         | -0.83819        | -2.07260 | 2.96602  |
| H                                         | -1.90998        | 0.01340  | 3.47583  |
| H                                         | -4.48918        | -1.32634 | 2.51955  |
| H                                         | -3.91956        | 1.49090  | 3.70793  |
| H                                         | -5.93002        | 2.23574  | 2.74019  |
| H                                         | -7.58719        | 0.52688  | 2.03758  |
| H                                         | -6.33926        | -0.62676 | 1.63281  |
| H                                         | -6.88506        | 2.04230  | 0.20541  |
| H                                         | -7.45311        | 0.47334  | -0.32414 |
| H                                         | 6.75853         | -1.02224 | -0.19801 |
| H                                         | 6.09777         | 0.96909  | 1.09570  |
| H                                         | 6.92876         | -4.60757 | -0.01784 |
| H                                         | 5.32197         | -4.69858 | -0.79490 |
| H                                         | 5.45606         | -4.63578 | 0.99244  |
| O                                         | 6.13846         | -0.27445 | -0.18933 |
| O                                         | 5.91512         | -2.86223 | -0.00480 |
| O                                         | 5.74182         | 1.75594  | 1.54854  |
| O                                         | -0.29981        | -1.28964 | -2.82295 |
| O                                         | -2.85224        | -3.40984 | -2.00330 |
| O                                         | -1.96295        | 0.22950  | -3.00005 |



**Table S2.** Cartesian coordinates of the lowest-energy conformers of the C-9 epimer of zosterabisphephone C (*epi-1*) optimized at the B3LYP/6-31+G(d,p) level.

| Conformer 1, E = -1956.7858667 Hartrees<br>$\Delta E = 0.00$ kcal/mol, population 75.1% |               |               |               | Conformer 2, E = -1956.784983 Hartrees<br>$\Delta E = 0.55$ kcal/mol, population 24.9% |                |               |               |
|-----------------------------------------------------------------------------------------|---------------|---------------|---------------|----------------------------------------------------------------------------------------|----------------|---------------|---------------|
| C                                                                                       | -0.8087401805 | 3.4323325795  | -3.8001763021 | C                                                                                      | -4.382483687   | -1.9000824549 | 0.4303581234  |
| C                                                                                       | -0.7365996568 | 3.0896488225  | -2.4404684911 | C                                                                                      | -3.7108803418  | -0.6891417801 | 0.1968336442  |
| C                                                                                       | -0.4063811209 | 1.7410024612  | -2.1524962647 | C                                                                                      | -2.3018194796  | -0.7705861213 | 0.0503736753  |
| C                                                                                       | -0.137396124  | 0.8308571017  | -3.1934179075 | C                                                                                      | -1.655887671   | -2.0204720785 | 0.0992395821  |
| C                                                                                       | -0.2015256604 | 1.1998259101  | -4.5429277148 | C                                                                                      | -2.3474085173  | -3.218821403  | 0.3178346725  |
| C                                                                                       | -0.5453354499 | 2.5140821401  | -4.8344463926 | C                                                                                      | -3.7233452932  | -3.1424898449 | 0.4904734868  |
| C                                                                                       | 0.1906200139  | -0.4725896931 | -2.6277894071 | C                                                                                      | -0.2255116274  | -1.8246225222 | -0.0848592334 |
| C                                                                                       | 0.1314438002  | -0.4234573879 | -1.2808572787 | C                                                                                      | 0.06575218     | -0.5119877554 | -0.2249334597 |
| C                                                                                       | -0.3029086083 | 0.9719943198  | -0.8212769268 | C                                                                                      | -1.2210558186  | 3.2054811105  | -0.1279748819 |
| C                                                                                       | 0.5831752081  | 1.5358402034  | 0.2732978614  | C                                                                                      | -1.4298369774  | 1.3068229932  | -1.2640841456 |
| C                                                                                       | 0.2256949998  | 1.8850964511  | 1.5220196623  | C                                                                                      | -1.547018718   | 2.6429798042  | -1.1786769879 |
| C                                                                                       | -1.1571468112 | 1.9261741215  | 2.1326713984  | C                                                                                      | -5.15684193191 | 3.5087147516  | 0.0609800449  |
| C                                                                                       | -1.728589073  | 3.3794939088  | 2.2904384418  | C                                                                                      | -2.9846945255  | 4.0874449513  | 0.3959588132  |
| C                                                                                       | -0.2748401978 | 5.3369127273  | -1.2616052471 | C                                                                                      | -5.5345296383  | 0.8343996497  | -0.7979532323 |
| C                                                                                       | -0.9298798765 | -0.826575314  | -1.3430346411 | C                                                                                      | -4.4282512797  | 0.6116465143  | 0.0590511414  |
| C                                                                                       | -1.587713377  | 3.6329519431  | -0.1922628474 | C                                                                                      | -3.8052272899  | 1.7391622275  | 0.6052203791  |
| C                                                                                       | -1.434976239  | 4.218806821   | 1.062280311   | C                                                                                      | -4.0567817867  | 3.0394655404  | 0.17151808    |
| C                                                                                       | -0.7499179279 | 5.4383277492  | 1.1222936536  | C                                                                                      | -5.1344234618  | 3.2305171001  | -0.7011716037 |
| C                                                                                       | -0.2308963722 | 6.0148294992  | -0.0359639842 | C                                                                                      | -5.8977090831  | 2.1452483369  | -1.1309289962 |
| C                                                                                       | -0.381265226  | 2.2288924263  | -7.2187135408 | C                                                                                      | -4.0040129889  | -5.5059960753 | 0.845274567   |
| C                                                                                       | 2.9535838642  | -0.9684459958 | -0.3011323956 | C                                                                                      | 1.417213881    | 0.548788832   | 2.2694023929  |
| C                                                                                       | 1.8587859814  | -2.0178564044 | -0.0662544508 | C                                                                                      | 2.1068772094   | 0.7598580326  | 0.9150349915  |
| C                                                                                       | 0.3636018673  | -1.5455848595 | -0.2947844433 | C                                                                                      | 1.4911945559   | -0.0117191588 | -0.3288743435 |
| C                                                                                       | -0.3070653573 | -2.8317856531 | -0.7701391556 | C                                                                                      | 1.7718803498   | 0.9618933036  | -1.4724884786 |
| C                                                                                       | 0.5895476161  | -3.7355942052 | -1.2145498503 | C                                                                                      | 2.0997096364   | 2.1928688033  | -1.0346418219 |
| C                                                                                       | 1.9690100815  | -3.2742228237 | -0.9849193153 | C                                                                                      | 2.1544503296   | 2.2414210201  | 0.4333292297  |
| C                                                                                       | -1.8042520019 | -3.0044948115 | -0.6732740571 | C                                                                                      | 1.7661693318   | 0.477900597   | -2.9022167516 |
| C                                                                                       | -2.252207878  | -2.8349656944 | 0.7727219691  | C                                                                                      | 2.7608946344   | -0.6652539587 | -3.0629017984 |
| C                                                                                       | -1.8594607009 | -3.6513235843 | 1.7678997043  | C                                                                                      | 4.0832747459   | -0.5312344995 | -2.8503270027 |
| C                                                                                       | -2.0521377277 | -3.373183526  | 3.1867500587  | C                                                                                      | 5.0160667585   | -1.6473758586 | -2.7384430221 |
| C                                                                                       | -1.3319395259 | -3.8889048819 | 4.2051578126  | C                                                                                      | 6.2157885704   | -1.6287546137 | -2.1198157101 |
| C                                                                                       | -0.2156089113 | -4.9002442241 | 4.1453459307  | C                                                                                      | 6.9128713584   | -0.4667207955 | -1.4585242339 |
| C                                                                                       | 1.1793807495  | -4.3441182481 | 4.5358412748  | C                                                                                      | 7.0563069818   | -0.5906063818 | 0.0817793732  |
| C                                                                                       | 3.0946123863  | -1.5461076764 | 1.8746622278  | C                                                                                      | 3.497518627    | -0.2883809932 | 2.4931080056  |
| C                                                                                       | 2.0996658713  | -2.3803197079 | 1.3816659879  | C                                                                                      | 3.4975026026   | 0.2442468948  | 1.2113371998  |
| C                                                                                       | 1.482811341   | -3.2972006192 | 2.2231612206  | C                                                                                      | 4.6421561047   | 0.1690719697  | 0.4283578075  |
| C                                                                                       | 1.8228089255  | -3.3445106242 | 3.5833914078  | C                                                                                      | 5.7808401445   | -0.4942501665 | 0.9087632469  |
| C                                                                                       | 2.8177397493  | -2.4667564727 | 4.0503384065  | C                                                                                      | 5.7346692516   | -1.0410532271 | 2.2040997577  |
| C                                                                                       | 3.4801182049  | -1.5638506951 | 3.206188075   | C                                                                                      | 4.6012620666   | -0.9374954669 | 3.0240020123  |
| H                                                                                       | 0.0184776758  | 0.481700107   | -5.3241565911 | H                                                                                      | -1.8195166503  | -4.1646769274 | 0.3563027642  |
| H                                                                                       | 0.4465209753  | -1.3422595238 | -3.2237142926 | H                                                                                      | 0.5039561102   | -2.6297630298 | -0.0696260404 |
| H                                                                                       | -1.3181514899 | 0.8472443901  | -0.4192898213 | H                                                                                      | -1.1365903821  | 0.8713198621  | 0.8147944346  |
| H                                                                                       | 1.6297027584  | 1.6434895791  | -0.0056452467 | H                                                                                      | -1.5006976125  | 0.8534829856  | -2.2526785181 |
| H                                                                                       | 1.0222548026  | 2.2600041017  | 2.1653345538  | H                                                                                      | -1.7072490378  | 3.1764039182  | -2.1168315199 |
| H                                                                                       | -1.1351245118 | 1.4566954989  | 3.1247180808  | H                                                                                      | -0.8712814509  | 4.3497993628  | -0.0685371823 |
| H                                                                                       | -1.8586197889 | 1.3350173964  | 1.534758133   | H                                                                                      | -1.1956233511  | 2.9497251983  | 0.9254035195  |
| H                                                                                       | -2.8032464871 | 3.3001064958  | 2.5028405628  | H                                                                                      | -2.9629604544  | 4.4586333385  | 1.4286973171  |
| H                                                                                       | -1.2731183206 | 3.8588414741  | 3.1624625002  | H                                                                                      | -3.1934419165  | 4.9525484747  | -0.2441459384 |
| H                                                                                       | -2.1303482084 | 2.6993026899  | -0.26440391   | H                                                                                      | -2.9884071662  | 1.5726523209  | 1.2958411969  |
| H                                                                                       | -0.5930499801 | 5.9292372648  | 2.0801043555  | H                                                                                      | -5.3630512632  | 4.2262450396  | -1.0745114768 |
| H                                                                                       | 0.2886542477  | 6.9672242341  | -0.0042505203 | H                                                                                      | -6.745323592   | 2.2825223341  | -1.7949443043 |
| H                                                                                       | -0.0457277626 | -1.2356687281 | 0.6708304861  | H                                                                                      | 2.0998610937   | -0.9075574722 | -0.4850098985 |
| H                                                                                       | 0.37239205    | -4.7010229258 | -1.6584983245 | H                                                                                      | 2.3044664064   | 3.0638857842  | -1.6471374059 |
| H                                                                                       | -2.0804031919 | -3.9911404891 | -1.0622524837 | H                                                                                      | 2.0058357841   | 1.3136433283  | -3.5691729595 |
| H                                                                                       | -2.3021129005 | -2.2590845782 | -1.3036984412 | H                                                                                      | 0.1290270984   | 0.7626855075  | -3.1690278556 |
| H                                                                                       | -2.8207625308 | -1.9381488399 | 1.015512872   | H                                                                                      | 2.3494205764   | -1.657702506  | -3.2421952846 |
| H                                                                                       | -1.2843875577 | -4.5375885545 | 1.5047050447  | H                                                                                      | 4.4724451884   | 0.4681983148  | -2.6630239414 |
| H                                                                                       | -2.7952581513 | -2.6125648164 | 3.4246564127  | H                                                                                      | 4.6596771963   | -2.6025205266 | -3.1234619112 |
| H                                                                                       | -1.5559849    | -3.517087385  | 5.2052461304  | H                                                                                      | 6.7546713468   | -2.5747559102 | -2.0616605302 |
| H                                                                                       | -0.4438033998 | -5.7038103647 | 4.8585699784  | H                                                                                      | 7.9318371594   | -0.4044399975 | -1.8638578789 |
| H                                                                                       | -0.1630170543 | -5.3828256435 | 3.1646840839  | H                                                                                      | 6.4364839787   | 0.4848956034  | -1.7131867862 |
| H                                                                                       | 1.1115547914  | -3.8872828901 | 5.5313567284  | H                                                                                      | 7.5559587053   | -1.539254428  | 0.3156079001  |
| H                                                                                       | 1.8536192976  | -5.2047364312 | 4.6494064161  | H                                                                                      | 7.7476494411   | 0.1981996599  | 0.4103318513  |
| H                                                                                       | 0.7318650328  | -3.9618304938 | 1.8218577734  | H                                                                                      | 4.6390665887   | 0.612121366   | -0.5567042491 |
| H                                                                                       | 3.091148228   | -2.4895466174 | 5.1024353495  | H                                                                                      | 6.6087414267   | -1.5594205253 | 2.5904826786  |
| H                                                                                       | 4.251883932   | -0.898962566  | 3.5782864739  | H                                                                                      | 4.582539315    | -1.3565397738 | 4.024073687   |
| H                                                                                       | -1.1439423747 | 4.7739036983  | -5.1251535975 | H                                                                                      | -6.0364248351  | -2.8011039941 | 0.7793130806  |
| H                                                                                       | -0.0044969575 | 5.6376043474  | -3.1383641591 | H                                                                                      | -6.2479505166  | -0.9474377807 | -0.8224827619 |
| H                                                                                       | -0.5237717051 | 2.8588796532  | -0.8097094126 | H                                                                                      | -4.8392590856  | -6.1775281661 | 1.0459459455  |
| H                                                                                       | 0.6534463794  | 1.8686664347  | -7.1877210935 | H                                                                                      | -3.5101071162  | -5.8036367187 | -0.0872499591 |
| H                                                                                       | -1.0695849725 | 1.3767390082  | -7.2624756836 | H                                                                                      | -3.2881151392  | -5.5511199846 | 1.6743496609  |
| O                                                                                       | -1.1480465294 | 4.7231335601  | -4.1548868734 | O                                                                                      | -5.7507521448  | -1.8875438388 | 0.6138733472  |
| O                                                                                       | -0.6659928503 | 3.0562674109  | -6.0933438188 | O                                                                                      | -4.202831521   | -4.202831521  | 0.7299208391  |
| O                                                                                       | 0.4061463122  | 5.9074135584  | -2.296121465  | O                                                                                      | -6.2366911751  | -0.1672753692 | -1.4068177195 |
| O                                                                                       | 3.2596293584  | -0.4071282445 | -1.3152962497 | O                                                                                      | 0.312916033    | 0.870167866   | 2.6157126461  |
| O                                                                                       | 3.0051608641  | -3.7947356412 | -1.34638903   | O                                                                                      | 2.2949048193   | 3.2114765422  | 1.151815932   |
| O                                                                                       | 3.6106782635  | -0.7102560987 | 0.8971899887  | O                                                                                      | 2.2774755988   | -0.1121469484 | 3.1319292309  |

**Table S3.** Experimental chemical shifts, calculated isotropic shielding constants, and predicted chemical shifts of zosterabispheone C (1). Calculations were performed at the PBE0/6-311+G(2d,p)/PCM(CHCl<sub>3</sub>)/B3LYP/6-31+G(d,p) level.

|                            | exp. $\delta_C$ | shielding constants | calcd. $\delta_C^{[a]}$ | $\Delta\delta_C$ |
|----------------------------|-----------------|---------------------|-------------------------|------------------|
| C-1                        | 138.2           | 42.61               | 137.38                  | -0.82            |
| C-2                        | 122.2           | 58.12               | 122.66                  | 0.46             |
| C-3                        | 140.4           | 39.42               | 140.41                  | 0.01             |
| C-4                        | 137.3           | 43.79               | 136.26                  | -1.04            |
| C-5                        | 103.4           | 81.30               | 100.65                  | -2.75            |
| C-6                        | 145.8           | 35.62               | 144.01                  | -1.79            |
| C-7                        | 130.1           | 48.25               | 132.02                  | 1.92             |
| C-8                        | 144.0           | 33.42               | 146.10                  | 2.10             |
| C-9                        | 53.0            | 128.56              | 55.78                   | 2.78             |
| C-10                       | 125.9           | 52.04               | 128.43                  | 2.53             |
| C-11                       | 135.0           | 42.57               | 137.42                  | 2.42             |
| C-12                       | 26.5            | 156.84              | 28.93                   | 2.43             |
| C-13                       | 34.0            | 149.06              | 36.31                   | 2.31             |
| C-14                       | 151.8           | 26.77               | 152.42                  | 0.62             |
| C-15                       | 122.8           | 57.96               | 122.81                  | 0.01             |
| C-16                       | 135.1           | 45.90               | 134.25                  | -0.85            |
| C-17                       | 132.1           | 49.57               | 130.77                  | -1.33            |
| C-18                       | 129.5           | 52.19               | 128.28                  | -1.22            |
| C-19                       | 116.4           | 65.69               | 115.47                  | -0.93            |
| 6-OMe                      | 56.2            | 131.23              | 53.25                   | -2.95            |
| C-1'                       | 171.8           | 6.74                | 171.44                  | -0.36            |
| C-2'                       | 65.4            | 114.54              | 69.09                   | 3.69             |
| C-3'                       | 54.7            | 126.26              | 57.96                   | 3.26             |
| C-4'                       | 181.2           | -7.32               | 184.78                  | 3.58             |
| C-5'                       | 127.5           | 52.39               | 128.10                  | 0.60             |
| C-6'                       | 200.1           | -20.92              | 197.70                  | -2.40            |
| C-7'                       | 31.2            | 152.55              | 33.00                   | 1.80             |
| C-8'                       | 125.5           | 52.92               | 127.59                  | 2.09             |
| C-9'                       | 133.5           | 45.32               | 134.80                  | 1.30             |
| C-10'                      | 127.9           | 52.05               | 128.41                  | 0.51             |
| C-11'                      | 131.0           | 46.86               | 133.34                  | 2.34             |
| C-12'                      | 24.3            | 160.13              | 25.81                   | 1.51             |
| C-13'                      | 31.7            | 152.02              | 33.51                   | 1.81             |
| C-14'                      | 150.3           | 29.82               | 149.52                  | -0.78            |
| C-15'                      | 128.3           | 51.72               | 128.73                  | 0.43             |
| C-16'                      | 119.4           | 61.85               | 119.12                  | -0.28            |
| C-17'                      | 135.8           | 44.94               | 135.17                  | -0.63            |
| C-18'                      | 130.2           | 51.61               | 128.83                  | -1.37            |
| C-19'                      | 110.1           | 72.98               | 108.55                  | -1.55            |
| <b>RMSD <sup>13</sup>C</b> |                 |                     |                         | <b>1.86</b>      |
|                            | exp. $\delta_H$ | shielding constants | calcd. $\delta_H^{[b]}$ | $\Delta\delta_H$ |
| H-5                        | 6.89            | 24.46               | 6.65                    | -0.24            |
| H-7                        | 6.52            | 24.68               | 6.46                    | -0.06            |
| H-9                        | 4.58            | 26.90               | 4.43                    | -0.15            |
| H-10                       | 4.41            | 26.86               | 4.46                    | 0.05             |
| H-11                       | 5.08            | 26.08               | 5.18                    | 0.10             |
| H-12                       | 2.01            | 29.62               | 1.95                    | -0.06            |
| H-12                       | 2.70            | 28.84               | 2.66                    | -0.04            |
| H-13                       | 2.50            | 29.03               | 2.48                    | -0.02            |
| H-13                       | 3.30            | 28.19               | 3.25                    | -0.05            |
| H-16                       | 7.56            | 23.65               | 7.39                    | -0.17            |
| H-18                       | 6.80            | 24.47               | 6.65                    | -0.15            |
| H-19                       | 6.78            | 24.54               | 6.59                    | -0.19            |
| H-3'                       | 3.68            | 27.65               | 3.75                    | 0.07             |
| H-5'                       | 6.43            | 25.14               | 6.03                    | -0.40            |
| H-7'                       | 3.51            | 27.97               | 3.45                    | -0.06            |
| H-7'                       | 3.00            | 28.43               | 3.03                    | 0.03             |
| H-8'                       | 5.53            | 25.64               | 5.58                    | 0.05             |
| H-9'                       | 6.72            | 24.36               | 6.75                    | 0.03             |
| H-10'                      | 5.89            | 25.29               | 5.89                    | 0.00             |
| H-11'                      | 5.34            | 25.88               | 5.36                    | 0.02             |
| H-12'                      | 2.33            | 29.31               | 2.23                    | -0.10            |
| H-12'                      | 2.95            | 28.46               | 3.01                    | 0.06             |
| H-13'                      | 2.66            | 28.88               | 2.62                    | -0.04            |
| H-13'                      | 3.02            | 28.50               | 2.97                    | -0.05            |
| H-16'                      | 7.06            | 24.16               | 6.93                    | -0.13            |
| H-18'                      | 7.06            | 24.12               | 6.96                    | -0.10            |
| H-19'                      | 7.01            | 24.33               | 6.77                    | -0.24            |
| 6-OMe                      | 3.95            | 27.44               | 3.75                    | -0.20            |
| <b>RMSD <sup>1</sup>H</b>  |                 |                     |                         | <b>0.134</b>     |

[a] <sup>13</sup>C chemical shifts were obtained from the isotropic shielding constants according to ref. 9, using the equation:  $\delta = (187.3123 - \text{shielding})/1.0533$

[b] <sup>1</sup>H chemical shifts were obtained from the isotropic shielding constants according to ref. 9, using the equation:  $\delta = (31.7532 - \text{shielding})/1.0958$

**Table S4.** Experimental chemical shifts, calculated isotropic shielding constants, and predicted chemical shifts of the two conformers of the C-9 epimer of zosterabisphenone C (*epi-1*). Calculations were performed at the PBE0/6-311+G(2d,p)/PCM(CHCl<sub>3</sub>)/B3LYP/6-31+G(d,p) level.

|       | isotropic shieldings |                                                               |                                                               |         |                            | calcd. $\delta_C^{[a]}$ | $\Delta\delta_C$ |
|-------|----------------------|---------------------------------------------------------------|---------------------------------------------------------------|---------|----------------------------|-------------------------|------------------|
|       | exp. $\delta_C$      | Conformer 1<br>$\Delta E = 0.00$ kcal/mol<br>population 75.1% | Conformer 2<br>$\Delta E = 0.55$ kcal/mol<br>population 24.9% | average |                            |                         |                  |
| C-1   | 138.2                | 42.65                                                         | 42.65                                                         | 42.65   | 137.34                     | -0.86                   |                  |
| C-2   | 122.2                | 58.22                                                         | 57.82                                                         | 58.12   | 122.66                     | 0.46                    |                  |
| C-3   | 140.4                | 40.41                                                         | 37.36                                                         | 39.65   | 140.19                     | -0.21                   |                  |
| C-4   | 137.3                | 42.89                                                         | 45.15                                                         | 43.45   | 136.58                     | -0.72                   |                  |
| C-5   | 103.4                | 81.44                                                         | 82.09                                                         | 81.60   | 100.36                     | -3.04                   |                  |
| C-6   | 145.8                | 35.56                                                         | 35.95                                                         | 35.65   | 143.98                     | -1.82                   |                  |
| C-7   | 130.1                | 47.42                                                         | 43.97                                                         | 46.56   | 133.63                     | 3.53                    |                  |
| C-8   | 144.0                | 35.08                                                         | 36.39                                                         | 35.41   | 144.22                     | 0.22                    |                  |
| C-9   | 53.0                 | 126.98                                                        | 129.94                                                        | 127.72  | 56.58                      | 3.58                    |                  |
| C-10  | 125.9                | 53.74                                                         | 53.12                                                         | 53.59   | 126.96                     | 1.06                    |                  |
| C-11  | 135.0                | 42.49                                                         | 41.42                                                         | 42.22   | 137.75                     | 2.75                    |                  |
| C-12  | 26.5                 | 156.98                                                        | 155.64                                                        | 156.64  | 29.12                      | 2.62                    |                  |
| C-13  | 34.0                 | 148.94                                                        | 148.98                                                        | 148.95  | 36.43                      | 2.43                    |                  |
| C-14  | 151.8                | 26.42                                                         | 26.97                                                         | 26.56   | 152.62                     | 0.82                    |                  |
| C-15  | 122.8                | 58.22                                                         | 58.03                                                         | 58.17   | 122.61                     | -0.19                   |                  |
| C-16  | 135.1                | 46.40                                                         | 45.58                                                         | 46.19   | 133.98                     | -1.12                   |                  |
| C-17  | 132.1                | 50.10                                                         | 48.55                                                         | 49.71   | 130.64                     | -1.46                   |                  |
| C-18  | 129.5                | 51.87                                                         | 52.33                                                         | 51.98   | 128.48                     | -1.02                   |                  |
| C-19  | 116.4                | 65.51                                                         | 65.93                                                         | 65.61   | 115.54                     | -0.86                   |                  |
| 6-OMe | 56.2                 | 131.24                                                        | 131.36                                                        | 131.27  | 53.21                      | -2.99                   |                  |
| C-1'  | 171.8                | 7.05                                                          | 5.57                                                          | 6.68    | 171.49                     | -0.31                   |                  |
| C-2'  | 65.4                 | 115.62                                                        | 113.81                                                        | 115.17  | 68.49                      | 3.09                    |                  |
| C-3'  | 54.7                 | 125.26                                                        | 120.26                                                        | 124.01  | 60.09                      | 5.39                    |                  |
| C-4'  | 181.2                | -8.19                                                         | -8.48                                                         | -8.26   | 185.68                     | 4.48                    |                  |
| C-5'  | 127.5                | 53.21                                                         | 50.26                                                         | 52.47   | 128.02                     | 0.52                    |                  |
| C-6'  | 200.1                | -21.29                                                        | -20.33                                                        | -21.05  | 197.82                     | -2.28                   |                  |
| C-7'  | 31.2                 | 152.81                                                        | 151.72                                                        | 152.54  | 33.01                      | 1.81                    |                  |
| C-8'  | 125.5                | 52.83                                                         | 52.57                                                         | 52.76   | 127.74                     | 2.24                    |                  |
| C-9'  | 133.5                | 44.82                                                         | 45.10                                                         | 44.89   | 135.22                     | 1.72                    |                  |
| C-10' | 127.9                | 52.06                                                         | 52.03                                                         | 52.05   | 128.41                     | 0.51                    |                  |
| C-11' | 131.0                | 46.35                                                         | 46.78                                                         | 46.46   | 133.73                     | 2.73                    |                  |
| C-12' | 24.3                 | 160.12                                                        | 160.23                                                        | 160.15  | 25.79                      | 1.49                    |                  |
| C-13' | 31.7                 | 152.00                                                        | 152.06                                                        | 152.02  | 33.51                      | 1.81                    |                  |
| C-14' | 150.3                | 29.65                                                         | 29.67                                                         | 29.65   | 149.68                     | -0.62                   |                  |
| C-15' | 128.3                | 51.70                                                         | 50.76                                                         | 51.46   | 128.98                     | 0.68                    |                  |
| C-16' | 119.4                | 62.57                                                         | 62.75                                                         | 62.62   | 118.39                     | -1.01                   |                  |
| C-17' | 135.8                | 45.58                                                         | 44.71                                                         | 45.37   | 134.76                     | -1.04                   |                  |
| C-18' | 130.2                | 52.11                                                         | 51.96                                                         | 52.07   | 128.40                     | -1.80                   |                  |
| C-19' | 110.1                | 72.43                                                         | 72.86                                                         | 72.54   | 108.97                     | -1.13                   |                  |
|       |                      |                                                               |                                                               |         | <b>RMSD <sup>13</sup>C</b> | <b>2.10</b>             |                  |
|       | exp. $\delta_H$      | Conformer 1                                                   | Conformer 2                                                   | average | calcd. $\delta_H^{[b]}$    | $\Delta\delta_H$        |                  |
| H-5   | 6.89                 | 24.48                                                         | 24.60                                                         | 24.51   | 6.61                       | -0.28                   |                  |
| H-7   | 6.52                 | 24.63                                                         | 24.74                                                         | 24.66   | 6.48                       | -0.04                   |                  |
| H-9   | 4.58                 | 26.82                                                         | 25.74                                                         | 26.55   | 4.74                       | 0.16                    |                  |
| H-10  | 4.41                 | 26.90                                                         | 26.81                                                         | 26.88   | 4.45                       | 0.04                    |                  |
| H-11  | 5.08                 | 26.15                                                         | 26.08                                                         | 26.13   | 5.13                       | 0.05                    |                  |
| H-12  | 2.01                 | 29.51                                                         | 29.34                                                         | 29.47   | 2.08                       | 0.07                    |                  |
| H-12  | 2.70                 | 28.80                                                         | 28.47                                                         | 28.72   | 2.77                       | 0.07                    |                  |
| H-13  | 2.50                 | 29.01                                                         | 28.95                                                         | 29.00   | 2.52                       | 0.02                    |                  |
| H-13  | 3.30                 | 28.23                                                         | 28.09                                                         | 28.20   | 3.25                       | -0.05                   |                  |
| H-16  | 7.56                 | 23.64                                                         | 23.44                                                         | 23.59   | 7.45                       | -0.11                   |                  |
| H-18  | 6.80                 | 24.45                                                         | 24.42                                                         | 24.45   | 6.67                       | -0.13                   |                  |
| H-19  | 6.78                 | 24.53                                                         | 24.52                                                         | 24.53   | 6.60                       | -0.18                   |                  |
| H-3'  | 3.68                 | 27.75                                                         | 27.26                                                         | 27.63   | 3.76                       | 0.08                    |                  |
| H-5'  | 6.43                 | 25.18                                                         | 25.39                                                         | 25.23   | 5.95                       | -0.48                   |                  |
| H-7'  | 3.51                 | 27.91                                                         | 28.06                                                         | 27.95   | 3.47                       | -0.04                   |                  |
| H-7'  | 3.00                 | 28.41                                                         | 28.70                                                         | 28.48   | 2.99                       | -0.01                   |                  |
| H-8'  | 5.53                 | 25.37                                                         | 25.43                                                         | 25.39   | 5.81                       | 0.28                    |                  |
| H-9'  | 6.72                 | 24.23                                                         | 24.33                                                         | 24.25   | 6.84                       | 0.12                    |                  |
| H-10' | 5.89                 | 25.14                                                         | 25.20                                                         | 25.15   | 6.02                       | 0.13                    |                  |
| H-11' | 5.34                 | 25.78                                                         | 25.81                                                         | 25.79   | 5.44                       | 0.10                    |                  |
| H-12' | 2.33                 | 29.28                                                         | 29.28                                                         | 29.28   | 2.26                       | -0.07                   |                  |
| H-12' | 2.95                 | 28.44                                                         | 28.46                                                         | 28.45   | 3.02                       | 0.07                    |                  |
| H-13' | 2.66                 | 28.85                                                         | 28.83                                                         | 28.84   | 2.65                       | -0.01                   |                  |
| H-13' | 3.02                 | 28.54                                                         | 28.51                                                         | 28.53   | 2.94                       | -0.08                   |                  |
| H-16' | 7.06                 | 24.18                                                         | 24.15                                                         | 24.18   | 6.91                       | -0.15                   |                  |
| H-18' | 7.06                 | 24.27                                                         | 24.16                                                         | 24.25   | 6.85                       | -0.21                   |                  |
| H-19' | 7.01                 | 24.48                                                         | 24.39                                                         | 24.46   | 6.66                       | -0.35                   |                  |
|       |                      | 27.44                                                         | 27.45                                                         |         |                            |                         |                  |
| 6-OMe | 3.95                 | 27.76                                                         | 27.75                                                         | 27.65   | 3.74                       | -0.21                   |                  |
|       |                      | 27.75                                                         | 27.79                                                         |         |                            |                         |                  |
|       |                      |                                                               |                                                               |         | <b>RMSD <sup>1</sup>H</b>  | <b>0.168</b>            |                  |

[a] <sup>13</sup>C chemical shifts were obtained from the isotropic shielding constants according to ref. 9, using the equation:  $\delta = (187.3123 - \text{shielding})/1.0533$

[b] <sup>1</sup>H chemical shifts were obtained from the isotropic shielding constants according to ref. 9, using the equation:  $\delta = (31.7532 - \text{shielding})/1.0958$

**Table S5.** Experimental multiplicity of <sup>1</sup>H NMR signals and predicted <sup>1</sup>H-<sup>1</sup>H *J* couplings (Hz) of zosterabispheone C (**1**). Predicted couplings whose magnitude is smaller than 0.2 Hz are not reported.

| southern unit |                                              | predicted <sup>1</sup> H- <sup>1</sup> H <i>J</i> couplings (Hz) |      |      |      |      |           |           |           |           |      |      |      |      |
|---------------|----------------------------------------------|------------------------------------------------------------------|------|------|------|------|-----------|-----------|-----------|-----------|------|------|------|------|
| Position      | $\delta_{\text{H}}$ , mult ( <i>J</i> in Hz) | H-5                                                              | H-7  | H-9  | H-10 | H-11 | H-12 proR | H-12 proS | H-13 proR | H-13 proS | H-16 | H-18 | H-19 | H-3' |
| H-5           | 6.89, s                                      |                                                                  | -0.3 |      |      |      |           |           |           |           |      |      |      |      |
| H-7           | 6.52, s                                      | -0.3                                                             |      | -2.2 |      |      |           |           |           |           |      |      |      | -0.9 |
| H-9           | 4.58, br. d (11.1)                           |                                                                  | -2.2 |      | 11.0 | -0.8 | -0.7      |           |           |           | -0.4 |      |      | -0.5 |
| H-10          | 4.41, t (11.1)                               |                                                                  |      |      | 11.0 | 11.4 | -0.9      | -1.7      |           | 0.4       |      |      |      |      |
| H-11          | 5.08, ddd (11.8, 11.1, 4.6)                  |                                                                  |      | -0.8 | 11.4 |      | 12.2      | 5.1       |           | -0.5      |      |      |      |      |
| H-12 proR     | 2.70, overlapped                             |                                                                  |      | -0.7 | -0.9 | 12.2 |           | -13.5     | 11.7      | 7.2       |      |      |      |      |
| H-12 proS     | 2.01, ddd (13.6, 6.1, 4.6)                   |                                                                  |      |      | -1.7 | 5.1  | -13.5     |           | 6.0       | 1.0       |      |      |      |      |
| H-13 proR     | 2.50, ddd (14.4, 12.1, 6.1)                  |                                                                  |      |      |      |      | 11.7      | 6.0       |           | -14.3     |      | -0.4 |      |      |
| H-13 proS     | 3.30, dd (14.4, 6.7)                         |                                                                  |      |      | 0.4  | -0.5 | 7.2       | 1.0       | -14.3     |           | -1.2 | -1.1 | 0.6  |      |
| H-16          | 7.56, br. s                                  |                                                                  |      | -0.4 |      |      |           |           |           |           | -1.2 |      | 2.0  | 0.4  |
| H-18          | 6.80, br. d (8.0)                            |                                                                  |      |      |      |      |           |           | -0.4      | -1.1      | 2.0  |      |      | 8.0  |
| H-19          | 6.78, d (8.0)                                |                                                                  |      |      |      |      |           |           |           | 0.6       | 0.4  | 8.0  |      |      |

| northern unit |                                              | predicted <sup>1</sup> H- <sup>1</sup> H <i>J</i> couplings (Hz) |      |           |           |      |      |       |       |            |            |            |            |       |       |       |
|---------------|----------------------------------------------|------------------------------------------------------------------|------|-----------|-----------|------|------|-------|-------|------------|------------|------------|------------|-------|-------|-------|
| Position      | $\delta_{\text{H}}$ , mult ( <i>J</i> in Hz) | H-3'                                                             | H-5' | H-7' proR | H-7' proS | H-8' | H-9' | H-10' | H-11' | H-12' proR | H-12' proS | H-13' proR | H-13' proS | H-16' | H-18' | H-19' |
| H-3'          | 3.68, s                                      |                                                                  | -0.9 | -0.4      | -0.8      |      |      |       |       |            |            |            |            |       |       |       |
| H-5'          | 6.43, s                                      | -0.9                                                             |      | -0.4      | -1.9      |      |      |       |       |            |            |            |            |       |       |       |
| H-7' proR     | 3.51, dd (14.4, 6.5)                         | -0.4                                                             | -0.4 |           | -14.2     | 7.0  | -2.0 | 0.7   | -1.1  |            | 1.1        |            |            |       |       |       |
| H-7' proS     | 3.00, overlapped                             | -0.8                                                             | -1.9 | -14.2     |           | 8.7  | -0.3 |       |       |            |            |            |            |       |       |       |
| H-8'          | 5.53, ddd (15.7, 8.3, 6.5)                   |                                                                  |      | 7.0       | 8.7       |      | 16.0 | -0.9  | 1.1   |            | -1.1       |            |            |       |       |       |
| H-9'          | 6.72, dd (15.7, 10.8)                        |                                                                  |      | -2.0      | -0.3      | 16.0 |      | 11.2  | -1.3  | -0.4       | 0.8        |            |            |       | -0.4  |       |
| H-10'         | 5.89, t (10.8)                               |                                                                  |      | 0.7       |           | -0.9 | 11.2 |       | 11.5  | -0.8       | -2.3       |            |            | 0.4   |       |       |
| H-11'         | 5.34, ddd (11.8, 10.8, 4.8)                  |                                                                  |      | -1.1      |           | 1.1  | -1.3 | 11.5  |       | 12.0       | 5.4        | -0.2       | -0.2       |       |       |       |
| H-12' proR    | 2.95, dddd (14.2, 13.2, 11.8, 2.9)           |                                                                  |      |           |           |      | -0.4 | -0.8  | 12.0  |            | -14.2      | 13.2       | 2.8        | -0.4  |       |       |
| H-12' proS    | 2.33, m                                      |                                                                  |      | 1.1       |           | -1.1 | 0.8  | -2.3  | 5.4   | -14.2      |            | 2.8        | 4.9        |       |       |       |
| H-13' proR    | 2.66, ddd (16.7, 13.2, 2.9)                  |                                                                  |      |           |           |      |      |       | -0.2  | 13.2       | 2.8        |            | -16.7      | -0.6  | -0.7  | 0.2   |
| H-13' proS    | 3.02, overlapped                             |                                                                  |      |           |           |      |      | 0.4   | -0.2  | 2.8        | 4.9        | -16.7      |            | -1.4  | -1.4  | 0.6   |
| H-16'         | 7.06, overlapped                             |                                                                  |      |           |           |      | -0.4 |       |       | -0.4       |            | -0.6       | -1.4       |       | 1.8   | 0.5   |
| H-18'         | 7.06, overlapped                             |                                                                  |      |           |           |      |      |       |       |            |            | -0.7       | -1.4       | 1.8   |       | 8.2   |
| H-19'         | 7.01, d (8.6)                                |                                                                  |      |           |           |      |      |       |       |            |            | 0.2        | 0.6        | 0.5   | 8.2   |       |

**Table S6.** Rotatory strengths (length formalism) calculated for zosterabisphenone C (**1**). Calculations were performed at the  $\omega$ B97XD/6-31+G(d,p)//B3LYP/6-31+G(d,p) level.

| Wavelength<br>(nm) | Rotatory strength<br>( $10^{-40}$ erg esu cm Gauss $^{-1}$ ) | Wavelength<br>(nm) | Rotatory strength<br>( $10^{-40}$ erg esu cm Gauss $^{-1}$ ) |
|--------------------|--------------------------------------------------------------|--------------------|--------------------------------------------------------------|
| 155.1              | -11.824400                                                   | 175.9              | 28.147200                                                    |
| 155.2              | -0.549600                                                    | 176.0              | -37.723400                                                   |
| 155.4              | -58.492000                                                   | 176.1              | -6.586400                                                    |
| 155.5              | 0.407900                                                     | 176.8              | -0.875400                                                    |
| 155.7              | -10.351400                                                   | 177.1              | -8.281600                                                    |
| 156.0              | -3.914100                                                    | 177.3              | 41.302600                                                    |
| 156.2              | 11.719200                                                    | 177.6              | -4.430300                                                    |
| 156.6              | -18.343800                                                   | 178.2              | -141.712300                                                  |
| 156.9              | 6.907300                                                     | 178.4              | -3.944500                                                    |
| 157.2              | 5.809300                                                     | 178.7              | 25.953900                                                    |
| 157.4              | 1.446600                                                     | 179.2              | 107.632700                                                   |
| 157.5              | 4.993900                                                     | 179.7              | 178.839100                                                   |
| 157.6              | 17.903200                                                    | 180.5              | 20.428800                                                    |
| 157.9              | 0.886100                                                     | 180.7              | 14.690600                                                    |
| 158.0              | -22.715300                                                   | 181.2              | -20.485600                                                   |
| 158.2              | -18.245600                                                   | 181.6              | -166.726800                                                  |
| 158.6              | -4.862300                                                    | 182.5              | -61.378200                                                   |
| 158.7              | -17.094800                                                   | 183.1              | 1.425700                                                     |
| 159.4              | -22.768600                                                   | 184.0              | -49.186700                                                   |
| 159.6              | 9.065700                                                     | 184.4              | 86.901700                                                    |
| 159.7              | 19.937700                                                    | 184.8              | 90.135300                                                    |
| 160.0              | -8.192400                                                    | 185.6              | -45.600000                                                   |
| 160.4              | -18.206300                                                   | 186.0              | 131.392900                                                   |
| 160.7              | 13.402200                                                    | 186.7              | 6.265300                                                     |
| 160.8              | -2.194600                                                    | 186.9              | 4.795800                                                     |
| 160.9              | -8.593000                                                    | 187.4              | -10.217400                                                   |
| 161.4              | -48.900200                                                   | 187.6              | 56.857400                                                    |
| 161.5              | -9.330500                                                    | 188.6              | 17.003700                                                    |
| 161.8              | -16.234700                                                   | 189.2              | -3.718800                                                    |
| 162.2              | -67.387200                                                   | 190.9              | 0.364000                                                     |
| 162.4              | -14.694900                                                   | 191.2              | -11.475800                                                   |
| 162.9              | -10.421500                                                   | 192.2              | -68.441900                                                   |
| 163.1              | -23.597500                                                   | 193.2              | -44.054300                                                   |
| 163.2              | -9.406400                                                    | 193.9              | -38.852200                                                   |
| 163.4              | -4.122900                                                    | 194.5              | -0.320400                                                    |
| 163.6              | -4.523500                                                    | 195.1              | -55.919100                                                   |
| 164.0              | -8.353300                                                    | 195.5              | -4.458300                                                    |
| 164.3              | -16.411900                                                   | 196.0              | -7.330300                                                    |
| 164.8              | 10.372200                                                    | 196.6              | -34.964100                                                   |
| 165.3              | 51.086300                                                    | 198.0              | 58.268000                                                    |
| 165.6              | 38.202900                                                    | 199.4              | 28.486300                                                    |
| 166.2              | -5.377800                                                    | 200.1              | 69.846900                                                    |
| 166.3              | -67.985600                                                   | 200.5              | 35.995400                                                    |
| 166.4              | 6.629000                                                     | 201.8              | -56.860600                                                   |
| 166.6              | 9.726500                                                     | 202.4              | -53.673400                                                   |
| 167.0              | -39.385300                                                   | 204.8              | 216.230500                                                   |
| 167.3              | -30.166300                                                   | 205.1              | 311.004800                                                   |
| 167.4              | 2.613600                                                     | 207.1              | -119.681400                                                  |
| 167.5              | 47.430400                                                    | 209.4              | -61.978100                                                   |
| 167.6              | 79.768200                                                    | 210.8              | -31.345700                                                   |
| 167.7              | -19.769800                                                   | 211.9              | -50.502400                                                   |
| 168.6              | 21.649400                                                    | 212.6              | -3.900800                                                    |
| 168.8              | -61.798300                                                   | 213.9              | -137.694400                                                  |
| 169.0              | 17.982200                                                    | 217.0              | 8.910600                                                     |
| 169.2              | 4.062100                                                     | 217.3              | -28.152000                                                   |
| 169.6              | -89.753000                                                   | 218.9              | 60.494300                                                    |
| 169.9              | -6.852100                                                    | 220.6              | -84.518700                                                   |
| 170.1              | 59.244800                                                    | 227.3              | 56.223600                                                    |
| 170.4              | -11.999800                                                   | 227.5              | -40.834000                                                   |
| 170.5              | -7.473500                                                    | 233.1              | -207.239400                                                  |
| 170.8              | -39.386200                                                   | 235.2              | 136.177500                                                   |
| 171.5              | -69.614900                                                   | 237.2              | 23.257900                                                    |
| 171.8              | -4.079800                                                    | 239.7              | 29.133300                                                    |
| 172.3              | 36.183800                                                    | 250.6              | -74.630300                                                   |
| 173.2              | -83.347900                                                   | 258.2              | 9.080400                                                     |
| 173.6              | 102.615500                                                   | 269.0              | -73.029000                                                   |
| 173.9              | 28.350900                                                    | 270.4              | 128.473100                                                   |
| 174.1              | -19.464000                                                   | 275.0              | 33.057700                                                    |
| 174.7              | -0.836700                                                    | 282.6              | 8.636000                                                     |
| 175.6              | -60.436800                                                   | 303.2              | 17.373700                                                    |

**Table S7.** Effects of zosterabisphenone A (**4**), B (**5**), and C (**1**) on the viability of HCT116 and Hep G2 cells after 48 hours of treatment. The results are expressed as percentage of cell viability. Each value represents the mean  $\pm$  SEM of 3 experiments including 5–6 replicates for each treatment. Viability of 20% DMSO, used as positive control, was 13.32 $\pm$ 0.90 for HCT116 and 1.65 $\pm$ 0.32 for Hep G2. \*\* P < 0.0001

| concentration [ $\mu$ M] | zosterabisphenone A ( <b>4</b> ) <sup>a</sup> |                 | zosterabisphenone B ( <b>5</b> ) <sup>a</sup> |                   | zosterabisphenone C ( <b>1</b> ) |                 |
|--------------------------|-----------------------------------------------|-----------------|-----------------------------------------------|-------------------|----------------------------------|-----------------|
|                          | HCT116                                        | Hep G2          | HCT116                                        | Hep G2            | HCT116                           | Hep G2          |
| Ctrl                     | 100.0 $\pm$ 1.5                               | 100.0 $\pm$ 3.0 | 100.0 $\pm$ 3.0                               | 100.0 $\pm$ 2.9   | 100.0 $\pm$ 1.7                  | 100.0 $\pm$ 2.2 |
| 0.1                      | 97.6 $\pm$ 1.5                                | 103.0 $\pm$ 4.0 | 102.0 $\pm$ 2.8                               | 97.4 $\pm$ 3.4    | 97.5 $\pm$ 1.6                   | 101.0 $\pm$ 2.6 |
| 0.3                      | 95.2 $\pm$ 1.8                                | 112.0 $\pm$ 4.5 | 79.4 $\pm$ 3.3 **                             | 91.7 $\pm$ 2.0    | 96.0 $\pm$ 1.4                   | 97.6 $\pm$ 2.4  |
| 1                        | 96.0 $\pm$ 1.6                                | 105.0 $\pm$ 2.8 | 76.0 $\pm$ 3.7 **                             | 91.6 $\pm$ 3.7    | 95.6 $\pm$ 0.9                   | 97.0 $\pm$ 2.7  |
| 3                        | 95.3 $\pm$ 2.1                                | 114.0 $\pm$ 3.6 | 42.9 $\pm$ 1.7 **                             | 89.0 $\pm$ 4.3    | 95.5 $\pm$ 1.2                   | 105.0 $\pm$ 2.4 |
| 10                       | 77.3 $\pm$ 1.4 **                             | 111.0 $\pm$ 2.4 | 2.6 $\pm$ 0.7 **                              | 61.2 $\pm$ 6.2 ** | 27.1 $\pm$ 1.2 **                | 106.0 $\pm$ 3.6 |

<sup>a</sup>Data from Ref. 3

## References

- (1) Li, Y.; Mangoni, A.; Shulha, O.; Çiçek, S. S.; Zidorn, C. Cyclic Diarylheptanoids Deoxycymodienol and Isotetradarene A from *Zostera Marina* (Zosteraceae). *Tetrahedron Lett.* **2019**, *60* (32), 150930. <https://doi.org/10.1016/j.tetlet.2019.07.021>
- (2) Grauso, L.; Li, Y.; Scarpato, S.; Shulha, O.; Rárová, L.; Strnad, M.; Teta, R.; Mangoni, A.; Zidorn, C. Structure and Conformation of Zosteraphenols, Tetracyclic Diarylheptanoids from the Seagrass *Zostera Marina*: An NMR and DFT Study. *Org. Lett.* **2020**, *22* (1), 78–82. <https://doi.org/10.1021/acs.orglett.9b03964>
- (3) Li, Y.; Grauso, L.; Scarpato, S.; Cacciola, N. A.; Borrelli, F.; Zidorn, C.; Mangoni, A. Stable Catechol Keto Tautomers in Cytotoxic Heterodimeric Cyclic Diarylheptanoids from the Seagrass *Zostera Marina*. *Org. Lett.* **2021**, *23* (18), 7134–7138. <https://doi.org/10.1021/acs.orglett.1c02537>
- (4) Li, Y.; Mangoni, A.; Zidorn, C. Seasonal Variation of Diarylheptanoids in *Zostera Marina* (Zosteraceae) from the Baltic Sea, Impact of Drying on Diarylheptanoids and Phenolics, and First Report of 3-Keto-Steroids. *Biochem. Syst. Ecol.* **2022**, *103*, 104446. <https://doi.org/10.1016/j.bse.2022.104446>
- (5) Bally, T.; Rablen, P. R. Quantum-Chemical Simulation of <sup>1</sup>H NMR Spectra. 2. Comparison of DFT-Based Procedures for Computing Proton–Proton Coupling Constants in Organic Molecules. *J. Org. Chem.* **2011**, *76* (12), 4818–4830. <https://doi.org/10.1021/jo200513q>
- (6) Lodewyk, M. W.; Siebert, M. R.; Tantillo, D. J. Computational Prediction of <sup>1</sup>H and <sup>13</sup>C Chemical Shifts: A Useful Tool for Natural Product, Mechanistic, and Synthetic Organic Chemistry. *Chem. Rev.* **2012**, *112* (3), 1839–1862. <https://doi.org/10.1021/cr200106v>. Scaling factors are also available at <http://cheshirenmr.info>
- (7) Grimblat, N.; Zanardi, M. M.; Sarotti, A. M. Beyond DP4: An Improved Probability for the Stereochemical Assignment of Isomeric Compounds Using Quantum Chemical Calculations of NMR Shifts. *J. Org. Chem.* **2015**, *80* (24), 12526–12534. <https://doi.org/10.1021/acs.joc.5b02396>
- (8) Bruhn, T.; Schaumlöffel, A.; Hemberger, Y.; Bringmann, G. SpecDis: Quantifying the Comparison of Calculated and Experimental Electronic Circular Dichroism Spectra. *Chirality* **2013**, *25* (4), 243–249. <https://doi.org/10.1002/chir.22138>
- (9) Edwards, J. M.; Mangion, M.; Anderson, J. B.; Rapposch, M.; Hite, G. Lachnanthospirone, a Dimeric 9-Phenylphenalenone from the Seeds of *Ell.* *Tetrahedron Lett.* **1979**, *20* (46), 4453–4456. [https://doi.org/10.1016/S0040-4039\(01\)86616-8](https://doi.org/10.1016/S0040-4039(01)86616-8)
- (10) Yang, L.; Qin, L. H.; Bligh, S. W. A.; Bashall, A.; Zhang, C. F.; Zhang, M.; Wang, Z. T.; Xu, L. S. A New Phenanthrene with a Spirolactone from *Dendrobium Chrysanthum* and Its Anti-Inflammatory Activities. *Bioorganic Med. Chem.* **2006**, *14* (10), 3496–3501. <https://doi.org/10.1016/j.bmc.2006.01.004>
- (11) Katsuki, N.; Isshiki, S.; Fukatsu, D.; Okamura, J.; Kuramochi, K.; Kawabata, T.; Tsubaki, K. Total Synthesis of Dendrochrysanene through a Frame Rearrangement. *J. Org. Chem.* **2017**, *82* (21), 11573–11584. <https://doi.org/10.1021/acs.joc.7b02223>
- (12) Sue, D.; Kawabata, T.; Sasamori, T.; Tokitoh, N.; Tsubaki, K. Synthesis of Spiro Compounds through Tandem Oxidative Coupling and a Framework Rearrangement Reaction. *Org. Lett.* **2010**, *12* (2), 256–258. <https://doi.org/10.1021/ol902571p>
- (13) Pérez-Lloréns, J. L.; Acosta, Y.; Brun, F. G. Seafood in Mediterranean Countries: A Culinary Journey through History. *Int. J. Gastron. Food Sci.* **2021**, *26*, 100437. <https://doi.org/10.1016/j.ijgfs.2021.100437>
